# Supplementary material for: Phylogenetic measures of biodiversity and neo- and paleo-endemism in Australian Acacia
Source: Springer Nature journal article supplement (doi:10.1038/ncomms5473), 2014-07-18
Supplement: 41467_2014_BFncomms5473_MOESM242_ESM.pdf [file 41467_2014_BFncomms5473_MOESM242_ESM.pdf]

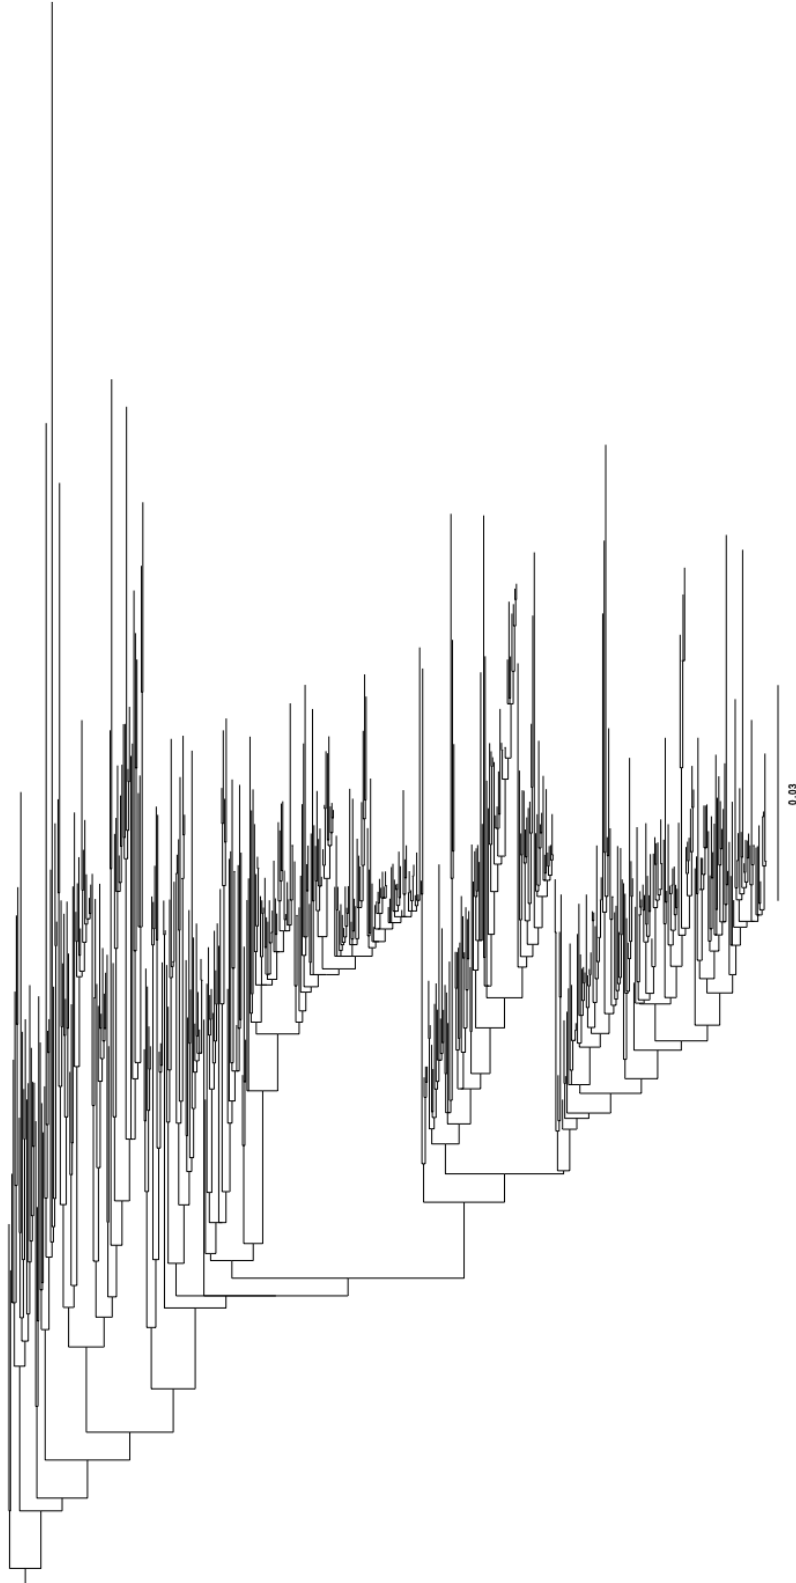

Supplemental Figure 1. Tree topology for *Acacia* used in this study, with branch lengths. For details including labels of tips, see Treebase submission.

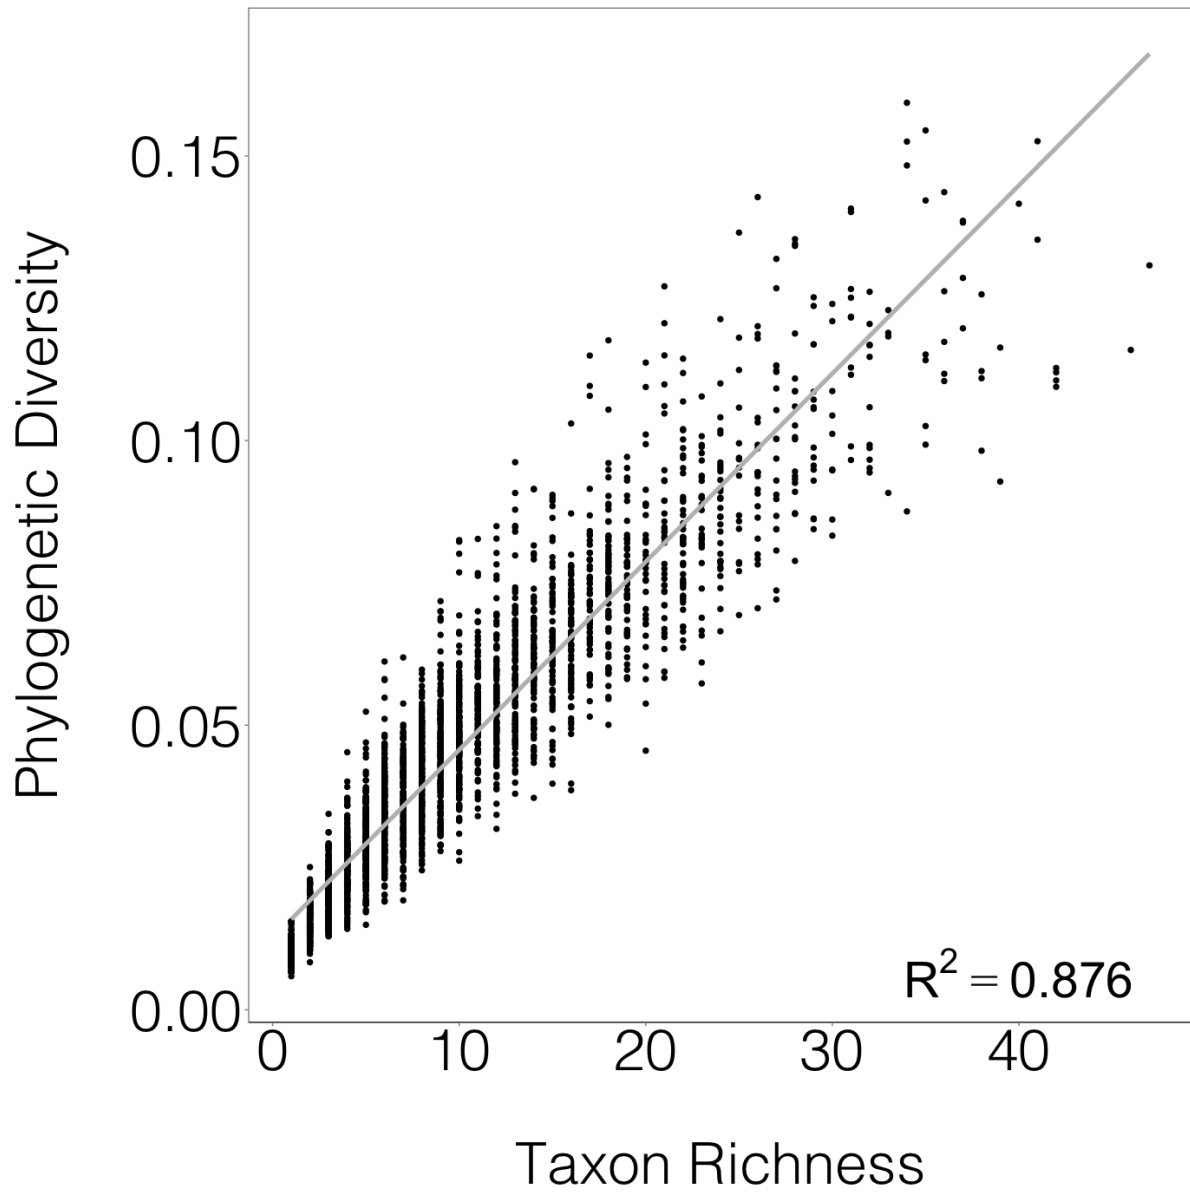

Supplemental Figure 2. Regression of PD on taxon richness.

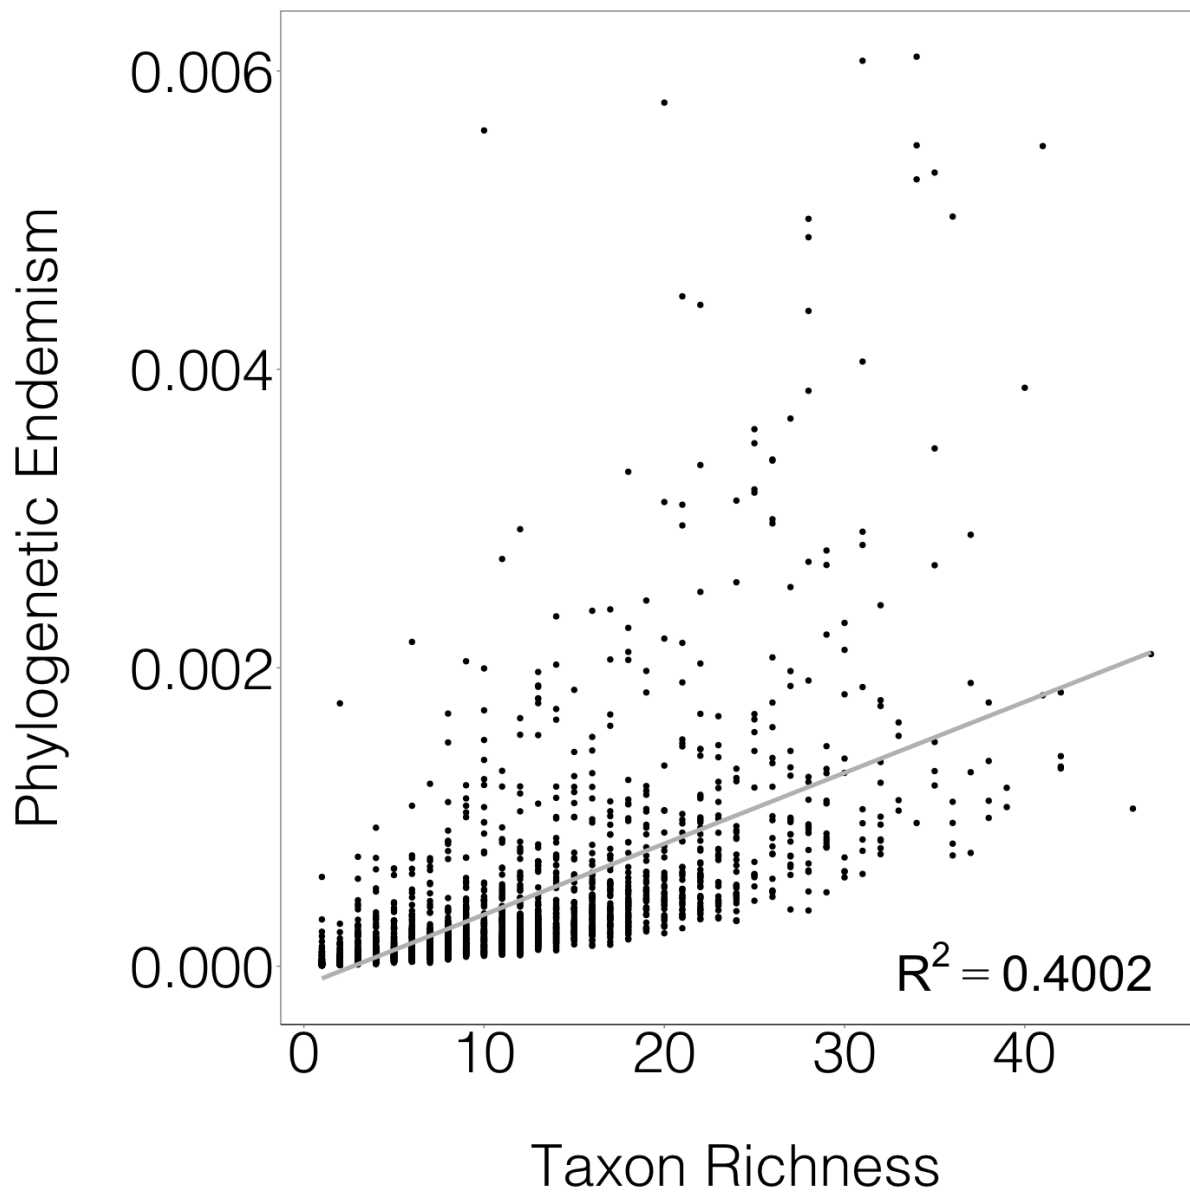

Supplemental Figure 3. Regression of PE on taxon richness.

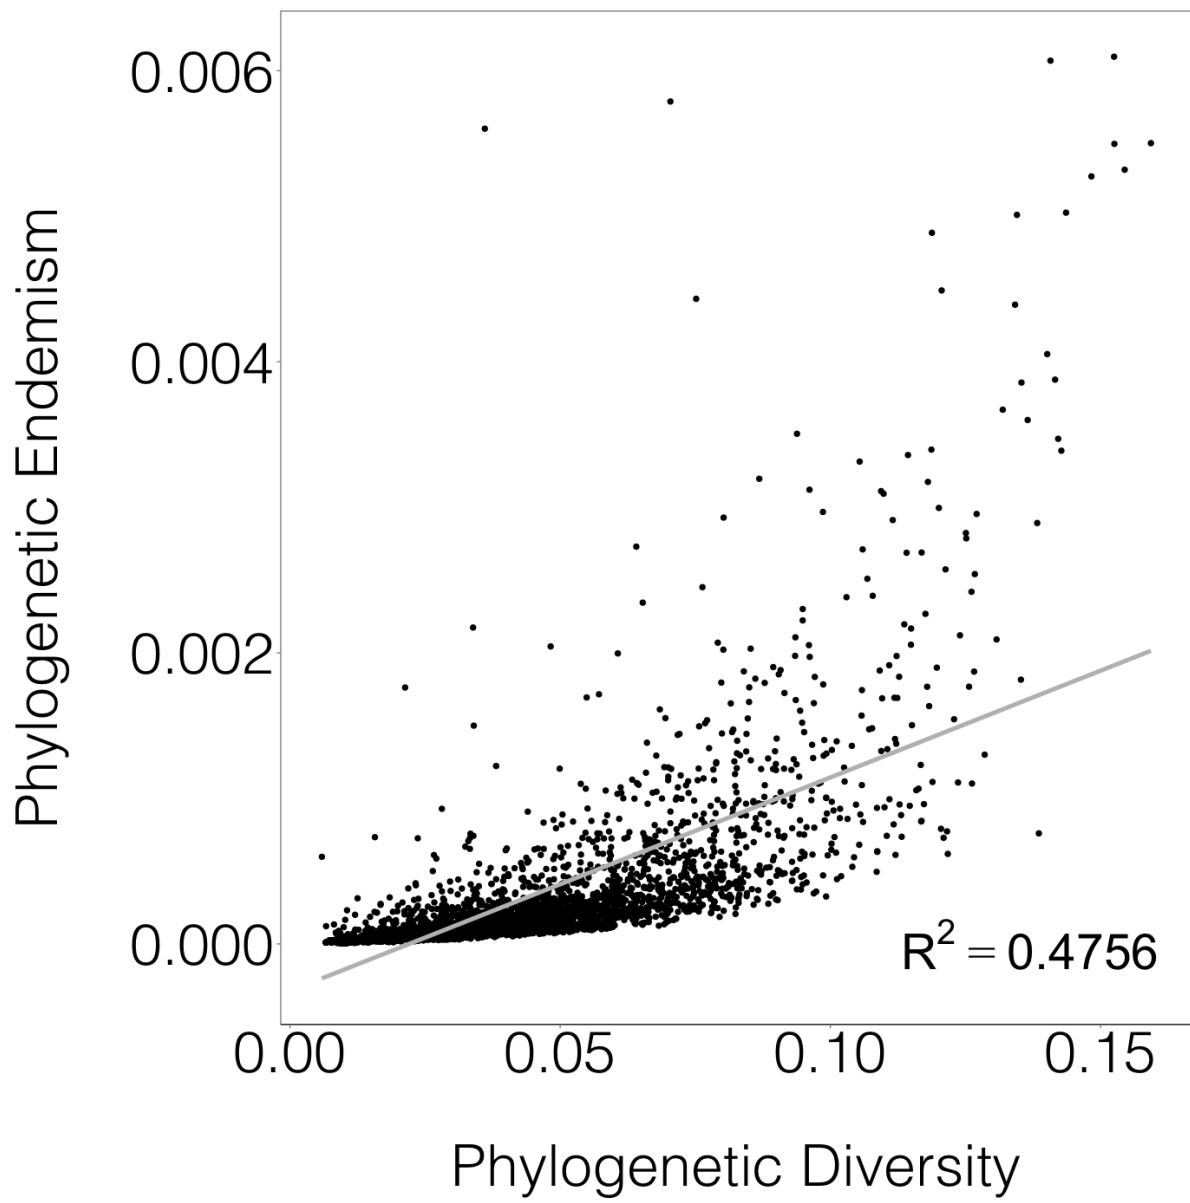

Supplemental Figure 4. Regression of PE on PD.

Supplemental Table 1. Voucher specimen information and Genbank accession number for each of this 6 loci for all species studied. In bold are newly generated sequences for this study. If no Genbank number is given, that species was missing data for that locus.

| Taxa                                             | Specimen #            | ETS             | ITS             | rpl32-trnL      | matK            | psbA-trnH       | trnL and trnL-F       |
|--------------------------------------------------|-----------------------|-----------------|-----------------|-----------------|-----------------|-----------------|-----------------------|
| Acacia abbreviata Maslin                         | ANBG 8212879          | JF420287        | JF420065        | JF420395        | <b>KC421289</b> | <b>KC796176</b> | JF420499              |
| Acacia acanthaster Maslin                        | CANB 00579933         | <b>KC283692</b> | <b>KC200572</b> | JQ943147        | <b>KC421622</b> | <b>KC283925</b> |                       |
| Acacia acanthoclada F.Muell. subsp. acanthoclada | CANB 770101.1s2       | <b>KC283690</b> |                 | JQ943146        | <b>KC421620</b> |                 | <b>KC957638</b>       |
| Acacia acinacea Lindl.                           | nindethana NS-10352   | <b>KC283389</b> | <b>KC200574</b> | JQ942724        | <b>KC421352</b> | <b>KC283926</b> | <b>KC958140</b>       |
| Acacia aciphylla Benth.                          | CANB 00439514         |                 |                 | <b>KC598183</b> | <b>KC610564</b> | <b>KC598190</b> | <b>KC610559</b>       |
| Acacia acoma Maslin                              | CANB 00458614         | <b>KC283706</b> | <b>KC200575</b> | JQ943165        | <b>KC421710</b> | <b>KF048566</b> | <b>KC957657</b>       |
| Acacia acradenia F.Muell.                        | J.T. Miller 1572      | <b>KC283836</b> | <b>KC200576</b> | JQ943245        | <b>KC421862</b> | <b>KC283930</b> | <b>KC957871</b>       |
| Acacia acrionastes Pedley                        | CANB 00439168         | <b>KC283695</b> | <b>KC200577</b> | JQ943150        | <b>KC421625</b> | <b>KC283931</b> |                       |
| Acacia acuaria W.Fitzg.                          | CBG 8200149           | <b>KC283694</b> |                 | JQ943149        | <b>KC421624</b> | <b>KC283932</b> | <b>KC957641</b>       |
| Acacia aculeatissima J.F.Macbr.                  | CANB 00702011         | <b>KC283693</b> |                 | JQ943148        | <b>KC421623</b> |                 | <b>KC957640</b>       |
| Acacia acuminata Benth.                          | Mount Annan BG 866885 | JF420313        | JQ248865        | JF420424        |                 | JF420205        | JF420526              |
| Acacia acutata W.Fitzg.                          | CANB 00438985         |                 |                 | JQ943163        | <b>KC421708</b> |                 | <b>KC957655</b>       |
| Acacia adinophylla Maslin                        | CANB 00496004         |                 |                 | JQ943158        | <b>KC421704</b> |                 | <b>KC957650</b>       |
| Acacia adnata F.Muell.                           | CANB 302867           | <b>KC283700</b> | <b>KC200579</b> | JQ943155        | <b>KC421701</b> | <b>KC283934</b> | <b>KC957647</b>       |
| Acacia adoxa Pedley var. adoxa                   | CANB 657983           | <b>KC283698</b> | <b>KC200581</b> | JQ943154        | <b>KC421628</b> |                 | <b>KC957645</b>       |
| Acacia adsurgens Maiden & Blakely                | CANB 00688512         | <b>KC283697</b> | <b>KC200583</b> | JQ943153        | <b>KC421627</b> | <b>KC283938</b> | <b>KC957644</b>       |
| Acacia adunca A.Cunn. ex G.Don                   | ANBG? 8502778         | JF420258        | JF420035        | JF420365        | JF419934        | JF420145        | JF420471              |
| Acacia aemula Maslin subsp. aemula               | CANB 00685165         | <b>KC595997</b> |                 |                 |                 | <b>KC598191</b> |                       |
| Acacia aestivalis E.Pritz.                       | CANB 00701974         | <b>KC283705</b> | <b>KC200586</b> | JQ943164        | <b>KC421709</b> | <b>KC283942</b> | <b>KC957656</b>       |
| Acacia alata var. tetrantha Maslin               | Leg. ign. s.n. 04     |                 | AF360699        |                 |                 | AF195713        | AF195676;<br>AF195695 |

|                                                                     |                        |                 |                 |                 |                 |                 |                 |
|---------------------------------------------------------------------|------------------------|-----------------|-----------------|-----------------|-----------------|-----------------|-----------------|
| Acacia alcockii<br>Maslin &<br>Whibley                              | CANB 00485361          | <b>KC283701</b> | <b>KC200589</b> | JQ943159        | <b>KC421705</b> | <b>KC283945</b> |                 |
| Acacia alexandri<br>Maslin                                          | MELU-SRA 148           | <b>KF048827</b> | <b>KC796228</b> | JQ942833        | <b>KC421416</b> | <b>KC283946</b> | <b>KC958219</b> |
| Acacia alpina<br>F.Muell.                                           | CANB 00699189          | <b>KC283711</b> | <b>KC200590</b> | JQ943173        | <b>KC421717</b> | <b>KC283947</b> | <b>KC957664</b> |
| Acacia amblygona<br>A.Cunn. ex<br>Benth.                            | CANB 842461            |                 | <b>KC200593</b> | <b>KC796131</b> | <b>KF048679</b> | <b>KC283950</b> | <b>KC957770</b> |
| Acacia<br>amblyophylla<br>F.Muell.                                  | CANB 633874            | <b>KC283271</b> | <b>KC200594</b> | JF420349        | JF419918        | JF420129        | JF420455        |
| Acacia ammobia<br>Maconochie                                        | J.T. Miller 1520       | <b>KC283797</b> | <b>KC200595</b> | JQ943201        | <b>KC421819</b> | <b>KC283953</b> | <b>KC957829</b> |
| Acacia ampliceps<br>Maslin                                          | MEL 2306645            |                 | <b>KC200598</b> |                 | <b>KC421736</b> | <b>KC283957</b> | <b>KC957686</b> |
| Acacia amyctica<br>R.S.Cowan &<br>Maslin                            | CANB 00438996          | <b>KC283709</b> |                 | JQ943171        |                 | <b>KC283958</b> |                 |
| Acacia anasilla<br>A.S.George                                       | CANB 678708            |                 | <b>KC200599</b> | JQ943170        | <b>KC421715</b> | <b>KC283959</b> | <b>KC957662</b> |
| Acacia anastema<br>Maslin                                           | CANB 8307978           |                 |                 | JQ943169        | <b>KC421714</b> | <b>KC283960</b> | <b>KC957661</b> |
| Acacia anaticeps<br>Tindale                                         | ATSC 18656             | <b>KC283535</b> |                 |                 | <b>KC421465</b> | <b>KC283961</b> |                 |
| Acacia anceps DC.                                                   | CANB 633876            | JF420244        |                 | JF420350        | JF419919        | JF420130        | JF420456        |
| Acacia<br>ancistrocarpa<br>Maiden &<br>Blakely                      | J.T. Miller 1576       | <b>KC283840</b> | <b>KC200603</b> | JQ943249        | <b>KC421866</b> | <b>KC283966</b> | <b>KC957875</b> |
| Acacia<br>ancistrophylla<br>C.R.P.Andrews<br>var.<br>ancistrophylla | CANB 00521716          | <b>KC283708</b> | <b>KC796204</b> | JQ943168        | <b>KC421713</b> | <b>KC283967</b> | <b>KC957660</b> |
| Acacia andrewsii<br>W.Fitzg.                                        | CANB 00579932          | <b>KC283717</b> | <b>KC200604</b> | JQ943181        | <b>KC421724</b> | <b>KC283970</b> | <b>KC957671</b> |
| Acacia aneura<br>F.Muell. ex<br>Benth.                              | B.R. Maslin<br>9574    | <b>KC283916</b> | <b>KC200607</b> | <b>KC796162</b> | <b>KC421956</b> | <b>KC283973</b> | <b>KC957959</b> |
| Acacia<br>anfractuosa<br>Maslin                                     | CABV 546842.1          | <b>KC283718</b> | <b>KC200614</b> | JQ943183        | <b>KC421726</b> | <b>KC283980</b> | <b>KC957673</b> |
| Acacia angusta<br>Maiden &<br>Blakely                               | CABV 681536            | <b>KC283714</b> |                 | JQ943178        | <b>KC421722</b> | <b>KC283982</b> | <b>KC957669</b> |
| Acacia<br>anthochaera<br>Maslin                                     | MELU-SRA 96            | <b>KF048826</b> | <b>KC796222</b> | JQ942819        | <b>KC421407</b> | <b>KC283983</b> | <b>KC958208</b> |
| Acacia<br>aphanoclada<br>Maslin                                     | MEL 2319315            | <b>KC283729</b> |                 | <b>KC796106</b> | <b>KC421737</b> | <b>KC283985</b> | <b>KC957687</b> |
| Acacia aphylla<br>Maslin                                            | ATSC 17667s3           |                 | <b>KC200616</b> | <b>KC796132</b> | <b>KF048681</b> | <b>KC283989</b> | <b>KC957772</b> |
| Acacia applanata<br>Maslin                                          | R.J. Cranfield<br>2101 | <b>KC283316</b> |                 | JQ942609        |                 | <b>KC283990</b> |                 |

|                                                    |                         |                 |                 |                 |                 |                 |                 |
|----------------------------------------------------|-------------------------|-----------------|-----------------|-----------------|-----------------|-----------------|-----------------|
| Acacia aprepta<br>Pedley                           | CBG 8803197             | <b>KC283645</b> |                 | JQ943086        | <b>KC421574</b> | <b>KC283991</b> | <b>KC957591</b> |
| Acacia aprica<br>Maslin &<br>A.R.Chapm.            | CANB 00511272           |                 | <b>KC200617</b> | JQ943182        | <b>KC421725</b> | <b>KC283992</b> | <b>KC957672</b> |
| Acacia araneosa<br>Whibley                         | CANB 00440043           | <b>KC283715</b> | <b>KC200619</b> | JQ943179        | <b>KC421723</b> | <b>KC283995</b> | <b>KC957670</b> |
| Acacia arcuatis<br>R.S.Cowan &<br>Maslin           | CANB 00579588           |                 | <b>KC200620</b> | JQ943177        | <b>KC421721</b> | <b>KC283996</b> | <b>KC957668</b> |
| Acacia areolata<br>M.W.McDonald                    | CANB 680045.1           |                 |                 | JQ943176        | <b>KC421720</b> | <b>KC283998</b> | <b>KC957667</b> |
| Acacia argutifolia<br>Maslin                       | CANB 363647             | <b>KC283864</b> | <b>KC200624</b> | JQ943267        | <b>KC421893</b> | <b>KC284002</b> | <b>KC957897</b> |
| Acacia argyraea<br>Tindale                         | ATSC 14665              | <b>KC283261</b> |                 | JQ942507        | <b>KC421186</b> |                 |                 |
| Acacia<br>argyrodendron<br>Domin                   | CBG 8213160             | <b>KC283644</b> |                 | JQ943084        | <b>KC421573</b> | <b>KC284003</b> |                 |
| Acacia<br>argyrophylla<br>Hook.                    | ATSC 19340              | JF420324        | <b>KF048797</b> | JF420435        |                 | <b>KC796194</b> | <b>KC958315</b> |
| Acacia arida<br>Benth.                             | CANB 00684304           |                 |                 |                 | <b>KC796125</b> | <b>KF048666</b> | <b>KC284004</b> |
| Acacia armitii<br>F.Muell. ex<br>Maiden            | CANB 270156             |                 | <b>KC200625</b> | <b>KC796124</b> | <b>KF048665</b> | <b>KC284006</b> | <b>KC957760</b> |
| Acacia arrecta<br>Maslin                           | nindethana NS-<br>5841  | <b>KC283369</b> |                 | JQ942676        | <b>KC421305</b> |                 | <b>KC958098</b> |
| Acacia ashbyae<br>Maslin                           | nindethana NS-<br>471   | <b>KC283390</b> | <b>KC200626</b> | JQ942725        | <b>KC421353</b> | <b>KC284007</b> | <b>KC958141</b> |
| Acacia aspera<br>Lindl.                            | nindethana NS-<br>7947  | JF420300        |                 | JF420409        | JF419976        | JF420189        |                 |
| Acacia<br>asperulacea<br>F.Muell.                  | CANB 00707915           | <b>KC283727</b> | <b>KC200627</b> | JQ943193        |                 | <b>KC284008</b> | <b>KC957683</b> |
| Acacia assimilis<br>S.Moore                        | Nindethana NS-<br>586s2 |                 | <b>KC200629</b> | <b>KC796133</b> | <b>KF048682</b> | <b>KC284011</b> | <b>KC957773</b> |
| Acacia ataxiphylla<br>Benth. subsp.<br>ataxiphylla | CANB 00579586           | <b>KC283725</b> |                 | JQ943191        | <b>KC421733</b> | <b>KC284012</b> | <b>KC957681</b> |
| Acacia atkinsiana<br>Maslin                        | ATSC 16763              | <b>KC283510</b> | <b>KC200631</b> | JQ942930        | <b>KC421440</b> | <b>KC284014</b> | JF420536        |
| Acacia atrox<br>Kodala                             | CANB 00549610           | <b>KC283724</b> | <b>KC200632</b> | JQ943190        | <b>KC421732</b> | <b>KC284015</b> | <b>KC957680</b> |
| Acacia attenuata<br>Maiden &<br>Blakely            | CANB 00439453           | <b>KC283722</b> | <b>KC200633</b> | JQ943188        | <b>KC421730</b> | <b>KC284016</b> | <b>KC957678</b> |
| Acacia<br>aulacocarpa<br>A.Cunn. ex<br>Benth.      | Clarke B                | JF420289        |                 | JF420398        | <b>KC421310</b> |                 | JF420501        |
| Acacia<br>aulacophylla<br>R.S.Cowan &<br>Maslin    | Paul Nevill<br>KPPN62   | <b>KC283609</b> |                 | JQ943034        | <b>KC013759</b> | <b>KC796198</b> | JX870592        |

|                                                  |                            |                 |                 |                 |                 |                 |                 |
|--------------------------------------------------|----------------------------|-----------------|-----------------|-----------------|-----------------|-----------------|-----------------|
| Acacia auratiflora<br>R.S.Cowan &<br>Maslin      | CANB 00579934              | <b>KC283721</b> | <b>KC200635</b> | JQ943187        | <b>KC421729</b> | <b>KC284019</b> | <b>KC957677</b> |
| Acacia<br>aureocrinita<br>B.J.Conn &<br>Tame     | CANB 680221                | <b>KC283720</b> |                 | JQ943186        | <b>KC421728</b> | <b>KC284020</b> | <b>KC957676</b> |
| Acacia auricoma<br>Maslin                        | ATSC 14048                 | <b>KC283260</b> |                 | JQ942506        | <b>KC421185</b> | <b>KC284021</b> |                 |
| Acacia<br>auriculiformis<br>A.Cunn. ex<br>Benth. | ATSC 15688                 | JN088171        | JN088172        | JN088173        | JN088175        | JN088177        | JN088179        |
| Acacia auronitens<br>Lindl.                      | CANB 00579592              |                 | <b>KC200636</b> | <b>KC796128</b> | <b>KF048676</b> | <b>KC284022</b> | <b>KC957768</b> |
| Acacia ausfeldii<br>Regel                        | CBG 9810230.1              | <b>KC283649</b> | <b>KC200639</b> | JQ943093        | <b>KC421578</b> | <b>KC284025</b> | <b>KC957598</b> |
| Acacia axillaris<br>Benth.                       | ANBG 8703504               | <b>KC283286</b> | <b>KC200640</b> |                 | <b>KC421218</b> |                 | <b>KC958003</b> |
| Acacia ayersiana<br>Maconochie                   | B.R. Maslin<br>9605        | <b>KC283920</b> | <b>KC200643</b> | <b>KC796163</b> | <b>KC421960</b> | <b>KC284031</b> |                 |
| Acacia baeuerlenii<br>Maiden &<br>R.T.Baker      | Clarke 22b                 | JF420229        | JQ248866        | JF420336        | JF419909        | JF420115        | JF420448        |
| Acacia baileyana<br>F.Muell.                     | CANB 592513                | <b>KC283441</b> | <b>KC200644</b> | JQ942835        |                 | <b>KC284034</b> | <b>KC958221</b> |
| Acacia bakeri<br>Maiden                          | CANB 00493519              |                 |                 | <b>KC796127</b> | <b>KF048672</b> | <b>KC284041</b> | <b>KC957765</b> |
| Acacia balsamea<br>R.S.Cowan &<br>Maslin         | CANB 00702545              |                 | <b>KC200647</b> | <b>KC796126</b> | <b>KF048670</b> | <b>KC284043</b> | <b>KC957764</b> |
| Acacia<br>bancroftiorum<br>Maiden                | ATSC 14756                 | <b>KC283551</b> | <b>KC200648</b> | JQ942977        | <b>KC421481</b> | <b>KC284044</b> | <b>KC958355</b> |
| Acacia barattensis<br>J.M.Black                  | ANBG 657677                | <b>KC283287</b> | <b>KC200649</b> | JQ942560        | <b>KC421219</b> | <b>KC284045</b> | <b>KC958004</b> |
| Acacia<br>barringtonensis<br>Tindale             | Mount Annan<br>BG 20051536 | <b>KC283432</b> | <b>KF048789</b> | JF420413        | <b>KC421383</b> | <b>KC284047</b> | <b>KC958177</b> |
| Acacia basedowii<br>Maiden                       | CANB 385998                |                 | <b>KC200653</b> | <b>KC796146</b> | <b>KC421795</b> |                 |                 |
| Acacia baueri<br>Benth.                          | CANB 00439454              |                 | <b>KC200654</b> | <b>KC796145</b> | <b>KC421792</b> | <b>KF048568</b> | <b>KC957796</b> |
| Acacia baxteri<br>Benth.                         | CBG 7901539                |                 | <b>KC200657</b> | <b>KC796144</b> | <b>KC421791</b> | <b>KC284052</b> | <b>KC957795</b> |
| Acacia beadleana<br>R.H.Jones &<br>J.J.Bruhl     | CANB 00590949              |                 |                 | <b>KC796130</b> | <b>KF048678</b> | <b>KC284053</b> |                 |
| Acacia<br>beauverdiana<br>Ewart &<br>Sharman     | CANB 00586540              |                 | <b>KC200658</b> | <b>KC796129</b> | <b>KF048677</b> | <b>KC284054</b> | <b>KC957769</b> |
| Acacia beckleri<br>Tindale                       | ANBG?<br>9707897           | JF420260        | JF420037        | JF420367        | JF419936        | JF420147        | JF420473        |
| Acacia benthamii<br>Meisn.                       | CANB 00685196              |                 | <b>KC200659</b> |                 | <b>KC421802</b> | <b>KC284055</b> | <b>KC957810</b> |



|                                                       |                          |                 |                 |                 |                 |                 |                 |
|-------------------------------------------------------|--------------------------|-----------------|-----------------|-----------------|-----------------|-----------------|-----------------|
| Acacia betchei<br>Maiden &<br>Blakely                 | ATSC 18093               | <b>KC283527</b> | <b>KC200660</b> | JQ942952        | <b>KC421456</b> | <b>KC284056</b> | <b>KC958331</b> |
| Acacia bidentata<br>Benth.                            | CBG 9710056              |                 |                 | <b>KC796153</b> |                 | <b>KC284057</b> | <b>KC957808</b> |
| Acacia bifaria<br>Maslin                              | CANB 00713711            |                 | <b>KC200661</b> | <b>KC796152</b> | <b>KC421800</b> | <b>KC284059</b> | <b>KC957807</b> |
| Acacia biflora<br>R.Br.                               | CANB 00495605            |                 |                 | <b>KC796151</b> | <b>KC421799</b> | <b>KC284060</b> | <b>KC957806</b> |
| Acacia binata<br>Maslin                               | ANBG 8604368             | <b>KC283288</b> | <b>KC200662</b> | JQ942562        | <b>KC421220</b> | <b>KC284061</b> | <b>KC958005</b> |
| Acacia binervata<br>DC.                               | MEL 2105904              | DQ489908        | <b>KC796221</b> | JQ942816        | <b>KC421406</b> | <b>KC284062</b> | <b>KC958205</b> |
| Acacia binervia<br>(J.C.Wendl.)<br>J.F.Macbr.         | Mount Annan<br>BG 884040 | <b>KC283431</b> | <b>KC200651</b> | JQ942777        | <b>KC421382</b> | <b>KC284063</b> | <b>KC958176</b> |
| Acacia bivenosa<br>DC.                                | MEL 2306648              | <b>KC283733</b> | <b>KC200665</b> | <b>KC796107</b> | <b>KC421742</b> | <b>KC284067</b> | <b>KC957692</b> |
| Acacia blakei<br>subsp. diphylla<br>(Tindale) Pedley  | ATSC 14754               | JN935145        | JQ248867        | JQ248615        | JQ248684        | JQ248740        |                 |
| Acacia blakelyi<br>Maiden                             | Leg. ign. s.n. 21        | <b>KC283245</b> | <b>KC200667</b> | JQ942483        |                 |                 |                 |
| Acacia blayana<br>Tindale & Court                     | MELU 102547              | DQ489909        | <b>KC796213</b> | JQ942800        | <b>KC421398</b> | <b>KC284071</b> | <b>KC958192</b> |
| Acacia boormanii<br>Maiden                            | CANB 633888              | <b>KC283272</b> | <b>KC200669</b> | JQ942526        | <b>KC421201</b> |                 | <b>KC957979</b> |
| Acacia<br>brachybotrya<br>Benth.                      | Clarke 17b               | JN006080        | JN006091        | JN006102        | JN006113        | JN006133        | <b>KC958116</b> |
| Acacia<br>brachyclada<br>W.Fitzg.                     | CBG 9804679.1            |                 |                 | <b>KC796150</b> |                 | <b>KC284074</b> | <b>KC957801</b> |
| Acacia<br>brachyphylla<br>Benth. var.<br>brachyphylla | CBG 9710626              |                 | <b>KC200673</b> | <b>KC796149</b> |                 | <b>KF048569</b> | <b>KC957800</b> |
| Acacia<br>brachypoda<br>Maslin                        | CANB 00495748            |                 |                 | <b>KC796148</b> | <b>KC421797</b> | <b>KC284078</b> | <b>KC957799</b> |
| Acacia<br>brachystachya<br>Benth.                     | J.T. Miller 1529         | <b>KC283801</b> | <b>KC200674</b> | JQ943207        | <b>KC421825</b> | <b>KC284079</b> | <b>KC957835</b> |
| Acacia bracteolata<br>Maslin                          | CANB 00587972            |                 | <b>KC200675</b> |                 | <b>KC421810</b> | <b>KC284080</b> |                 |
| Acacia brassii<br>Pedley                              | ATSC 19012               | <b>KC283506</b> | <b>KC200676</b> | JQ942926        | <b>KC421436</b> | <b>KC284081</b> | <b>KC958305</b> |
| Acacia brockii<br>Tindale &<br>Kodala                 | CANB 00492102            |                 |                 | <b>KC796155</b> | <b>KC421809</b> | <b>KC284082</b> | <b>KC957818</b> |
| Acacia<br>bromilowiana<br>Maslin                      | CANB 00713742            |                 |                 | <b>KC796154</b> | <b>KC421804</b> | <b>KC284083</b> | <b>KC957812</b> |
| Acacia browniana<br>H.L.Wendl. var.<br>browniana      | CBG 8310536              |                 |                 |                 |                 | <b>KC796202</b> |                 |

|                                                      |                            |                 |                 |                 |                 |                 |                 |
|------------------------------------------------------|----------------------------|-----------------|-----------------|-----------------|-----------------|-----------------|-----------------|
| Acacia bulgaensis<br>Tindale, Kodela<br>& S.J.Davies | Leg. ign. s.n. 29          | <b>KC283251</b> | <b>KC200677</b> | JQ942489        |                 |                 |                 |
| Acacia burkittii<br>F.Muell. ex<br>Benth.            | Clarke 15b                 | JN006081        | JN006092        | JN006103        | JN006114        | JN006134        | <b>KC958115</b> |
| Acacia buxifolia<br>A.Cunn.                          | ATSC 14412                 | <b>KC283492</b> | <b>KC200678</b> | JQ942904        | <b>KC421418</b> | <b>KC284086</b> | <b>KC958282</b> |
| Acacia caesiella<br>Maiden &<br>Blakely              | ANBG 643851                | <b>KC283290</b> | <b>KC200682</b> | JQ942564        | <b>KC421222</b> | <b>KC284090</b> | <b>KC958007</b> |
| Acacia calamifolia<br>Sweet ex Lindl.                | CANB 615689                | JF420245        | JF420021        | JF420351        | JF419920        | JF420131        | AF195670        |
| Acacia calantha<br>Pedley                            | CANB 439162                | <b>KC283859</b> | <b>KC200683</b> | JQ943262        | <b>KC421888</b> | <b>KC284091</b> | <b>KC957894</b> |
| Acacia calcicola<br>Forde & Ising                    | MEL 2233896                | <b>KC283735</b> | <b>KC200685</b> | <b>KC796108</b> | <b>KC421744</b> | <b>KC284093</b> | <b>KC957695</b> |
| Acacia<br>camptoclada<br>C.R.P.Andrews               | CANB 00532494              |                 | <b>KC200688</b> | <b>KC796156</b> | <b>KC421811</b> | <b>KC284096</b> | <b>KC957819</b> |
| Acacia<br>campylophylla<br>Benth.                    | CBG 8905944                |                 |                 | <b>KC796157</b> |                 | <b>KC284098</b> | <b>KC957820</b> |
| Acacia cana<br>Maiden                                | CBG 9513171                | <b>KC283646</b> | <b>KC200689</b> | JQ943088        | <b>KC421575</b> | <b>KC284099</b> | <b>KC957593</b> |
| Acacia cangaiensis<br>Tindale &<br>Kodela            | MELU-SRA 37                | <b>KC807392</b> | <b>KC796209</b> | JQ942791        | <b>KC421393</b> | <b>KC284101</b> |                 |
| Acacia<br>cardiophylla<br>A.Cunn. ex<br>Benth.       | CANB 492118                | JF420309        | JF420088        | JF420420        |                 | JF420201        | JF420522        |
| Acacia carneorum<br>Maiden                           | CANB 00511893              | JN935148        | JQ248870        | JQ248618        | JQ248687        | JQ248743        | JQ248816        |
| Acacia carnosula<br>Maslin                           | CANB 472321s2              | <b>KC283858</b> | <b>KC200695</b> |                 | <b>KC421887</b> | <b>KC284108</b> |                 |
| Acacia caroleae<br>Pedley                            | Clarke 42ca<br>(ironstone) | <b>KC283387</b> | <b>KC200696</b> | JQ942721        | <b>KC421350</b> |                 | <b>KC958138</b> |
| Acacia catenulata<br>C.T.White                       | CBG 8803206                | <b>KC283653</b> | <b>KC200698</b> | JQ943097        | <b>KC421581</b> | <b>KC284112</b> | <b>KC957601</b> |
| Acacia cavealis<br>R.S.Cowan &<br>Maslin             | CANB 579596s2              | <b>KC283856</b> | <b>KC200702</b> | JQ943261        | <b>KC421885</b> | <b>KC284116</b> | <b>KC957893</b> |
| Acacia cedroides<br>Benth.                           | CANB 7900861               | <b>KC283853</b> | <b>KC200705</b> | JQ943258        | <b>KC421882</b> | <b>KC284119</b> | <b>KC957890</b> |
| Acacia celastrifolia<br>Benth.                       | nindethana NS-<br>3672     | <b>KC283322</b> | <b>KC200706</b> |                 |                 | <b>KC284120</b> | <b>KC958051</b> |
| Acacia celsa<br>Tindale                              | CANB 507617s2              | <b>KC283850</b> | <b>KC200707</b> | JQ943255        | <b>KC421879</b> | <b>KC284121</b> | <b>KC957887</b> |
| Acacia chartacea<br>Maslin                           | MELU-SRA 100               | DQ029305        | <b>KC955301</b> | JQ942828        | <b>KC421414</b> | <b>KC284123</b> | <b>KC958216</b> |
| Acacia cheelii<br>Blakely                            | Clarke 43c                 | <b>KC283388</b> | <b>KC200710</b> | JQ942722        | <b>KC421351</b> | <b>KC284128</b> | <b>KC958139</b> |
| Acacia<br>chinchillensis<br>Tindale                  | CANB 842636                |                 | <b>KC200714</b> | <b>KC796134</b> | <b>KF048685</b> | <b>KC284131</b> | <b>KC957776</b> |
| Acacia chisholmii<br>F.M.Bailey                      | ATSC 14598                 | <b>KC283257</b> |                 | JQ942496        |                 | <b>KC284132</b> |                 |

|                                                 |                             |                 |                 |                 |                 |                 |                 |
|-------------------------------------------------|-----------------------------|-----------------|-----------------|-----------------|-----------------|-----------------|-----------------|
| Acacia<br>chrysotricha<br>Tindale               | Mount Annan<br>BG 941277    | <b>KC283472</b> | <b>KC200715</b> | JQ942875        |                 | <b>KC284133</b> | <b>KC958260</b> |
| Acacia<br>citriniviridis<br>Tindale &<br>Maslin | ANBG 16778                  | <b>KC283325</b> | <b>KC200716</b> | JQ942620        |                 | <b>KC284136</b> |                 |
| Acacia clelandii<br>Pedley                      | ANBG 633728                 |                 | <b>KC200717</b> | JQ942566        |                 | <b>KC284138</b> |                 |
| Acacia clunies-<br>rossiae Maiden               | Mount Annan<br>BG AF 913623 | <b>KC283477</b> | <b>KC200718</b> | JQ942883        |                 | <b>KC284139</b> | <b>KC958267</b> |
| Acacia<br>clydonophora<br>Maslin                | CANB 301183                 |                 |                 | <b>KC598184</b> | <b>KC610565</b> | <b>KC598192</b> | <b>KC610560</b> |
| Acacia cochlearis<br>(Labill.)<br>H.L.Wendl.    | CANB 615707                 | <b>KC283897</b> | <b>KC200719</b> | JQ943314        | AF523156        | <b>KC284140</b> | <b>KC957934</b> |
| Acacia cognata<br>Domin                         | ANBG 9101965                | <b>KC283310</b> | <b>KC200720</b> | JQ942599        | <b>KC421249</b> | <b>KC284141</b> | <b>KC958035</b> |
| Acacia colei<br>Maslin &<br>L.A.J.Thomson       | J.T. Miller 1577            | <b>KC283841</b> | <b>KC200722</b> | JQ943250        | <b>KC421867</b> | <b>KC284143</b> | <b>KC957876</b> |
| Acacia colletioides<br>Benth.                   | ANBG 633905                 | JN006083        | JN006094        | JN006105        | JN006116        | <b>KF048562</b> | JN006136        |
| Acacia<br>complanata<br>A.Cunn. ex<br>Benth.    | Clarke 31c                  | <b>KC283384</b> |                 | JQ942710        | <b>KC421339</b> | <b>KC284146</b> | <b>KC958127</b> |
| Acacia concurrens<br>Pedley                     | Clarke 21co                 | <b>KC595995</b> | <b>KC955269</b> |                 | <b>KC610562</b> | <b>KC598188</b> | <b>KC610557</b> |
| Acacia conferta<br>A.Cunn. ex<br>Benth.         | ATSC 14746                  | <b>KC283332</b> | <b>KC200725</b> | JQ942629        |                 | <b>KC284147</b> | <b>KC958062</b> |
| Acacia congesta<br>Benth. subsp.<br>congesta    | CANB 209830                 | <b>KC283848</b> |                 | <b>KC796158</b> | <b>KC421877</b> | <b>KC284151</b> | <b>KC957885</b> |
| Acacia consobrina<br>R.S.Cowan &<br>Maslin      | Mount Annan<br>BG 892141    | <b>KC283438</b> | <b>KC200729</b> | JQ942788        | <b>KC421390</b> | <b>KC284153</b> | <b>KC958185</b> |
| Acacia conspersa<br>F.Muell.                    | ATSC 18439                  | <b>KC283525</b> |                 | JQ942948        | <b>KC421453</b> | <b>KC284154</b> | <b>KC958327</b> |
| Acacia constablei<br>Tindale                    | MELU-SRA 13                 | DQ489917        | <b>KC796210</b> | JQ942792        | <b>KC421394</b> | <b>KC284156</b> | <b>KC958188</b> |
| Acacia continua<br>Benth.                       | nindethana NS-<br>11434     | <b>KC283358</b> | <b>KC200731</b> |                 |                 | <b>KC284158</b> | <b>KC958090</b> |
| Acacia<br>coolgardiensis<br>Maiden              | ATSC 17657                  | <b>KC283363</b> | <b>KC200733</b> | JQ942670        | <b>KC421298</b> | <b>KC284159</b> | <b>KC958092</b> |
| Acacia coriacea<br>DC.                          | MEL 2313072                 | <b>KC283745</b> | <b>KC200735</b> | <b>KC796110</b> | <b>KF048632</b> | <b>KC284161</b> | <b>KC957704</b> |
| Acacia costata<br>Benth.                        | CANB 345780                 | <b>KC283846</b> | <b>KC200736</b> | JQ943254        | <b>KC421875</b> | <b>KC284164</b> | <b>KC957883</b> |
| Acacia courtii<br>Tindale &<br>Herscovitch      | CANB 438905                 | <b>KC283845</b> | <b>KC200737</b> |                 | <b>KC421872</b> | <b>KC284165</b> | <b>KC957880</b> |
| Acacia covenyi<br>Tindale                       | ANBG 8910507                | <b>KC283292</b> | <b>KC200740</b> | JQ942568        | <b>KC421224</b> | <b>KC284168</b> | <b>KC958008</b> |

|                                                                   |                            |                 |                 |                 |                 |                 |                 |
|-------------------------------------------------------------------|----------------------------|-----------------|-----------------|-----------------|-----------------|-----------------|-----------------|
| Acacia cowleana<br>Tate                                           | ATSC 14600                 | <b>KC283274</b> |                 | JQ942530        | <b>KC421202</b> | <b>KC284170</b> | <b>KC957981</b> |
| Acacia<br>craspedocarpa<br>F.Muell.                               | B.R. Maslin<br>9731        | <b>KC283923</b> | <b>KC200744</b> | <b>KC796164</b> | <b>KC421964</b> | <b>KC284174</b> | <b>KC957967</b> |
| Acacia crassa<br>Pedley                                           | Mount Annan<br>BG 893778s2 |                 | <b>KC200745</b> | JQ942858        |                 | <b>KC284175</b> | <b>KC958242</b> |
| Acacia crassicarpa<br>A.Cunn. ex<br>Benth.                        | ATSC 15698                 | JF420236        |                 | JF420343        |                 | JF420122        |                 |
| Acacia<br>crassiuscula<br>H.L.Wendl.                              | CANB 790065                |                 | <b>KC200746</b> |                 | <b>KC421871</b> | <b>KC284177</b> | <b>KC957879</b> |
| Acacia cremiflora<br>B.J.Conn &<br>Tame                           | CANB 842897                |                 | <b>KC200747</b> | <b>KC956526</b> |                 | <b>KC284178</b> | <b>KC957778</b> |
| Acacia cultriformis<br>A.Cunn. ex<br>G.Don                        | ATSC 13625                 | JF420278        | JF420056        | JF420387        | <b>KC421263</b> | <b>KC796172</b> | JF420494        |
| Acacia cupularis<br>Domin                                         | MEL 2278498                | <b>KC283742</b> | <b>KC200753</b> | <b>KC796109</b> | <b>KC421751</b> | <b>KC284184</b> | <b>KC957699</b> |
| Acacia curranii<br>Maiden                                         | CANB 615671                | <b>KC283898</b> | AF487764        | JQ943315        | AF523179        | <b>KC284186</b> | <b>KC957935</b> |
| Acacia curvata<br>Maslin                                          | CANB 64851                 | <b>KC283844</b> |                 | JQ943253        | <b>KC421870</b> | <b>KC284187</b> |                 |
| Acacia cuspidifolia<br>Maslin                                     | CANB 320534                | <b>KF048828</b> | <b>KF048803</b> | <b>KF048762</b> | <b>KF048693</b> | <b>KF048571</b> | <b>KF048238</b> |
| Acacia<br>cuthbertsonii<br>Luehm.                                 | ATSC 20080                 | JN935152        | JQ248874        | JQ248625        | JQ248691        | JQ248747        | JQ248820        |
| Acacia cyclops<br>A.Cunn. ex<br>G.Don                             | ATSC 17674                 | JF420248        | JF420024        | JF420354        | JF419923        | JF420134        | JF420460        |
| Acacia<br>cyperophylla<br>F.Muell. ex<br>Benth.                   | J.T. Miller 1560           | <b>KC283825</b> | <b>KC200755</b> | JQ943233        | <b>KC421850</b> | <b>KC284189</b> | <b>KC957859</b> |
| Acacia<br>dangarensis<br>Tindale &<br>Kodala                      | ANBG 657691                | <b>KC283311</b> | <b>KC200758</b> | JQ942600        | <b>KC421250</b> | <b>KC284192</b> | <b>KC958036</b> |
| Acacia dawsonii<br>R.T.Baker                                      | Clarke 9da                 | JN935153        | JQ248875        | JQ248626        | JQ248692        | JQ248748        | JQ248821        |
| Acacia dealbata<br>Link                                           | CANB 546294                | <b>KC283443</b> | <b>KC200762</b> | JQ942839        |                 | <b>KC284196</b> | <b>KC958225</b> |
| Acacia deanei<br>(R.T.Baker)<br>M.B.Welch,<br>Coombs &<br>McGlynn | Leg. ign. s.n. 26          | <b>KC283248</b> | <b>KC200766</b> | JQ942486        |                 |                 |                 |
| Acacia debilis<br>Tindale                                         | Mount Annan<br>BG 930267   | <b>KC283474</b> | <b>KC200770</b> | JQ942878        |                 | <b>KC284205</b> | <b>KC958263</b> |
| Acacia declinata<br>R.S.Cowan &<br>Maslin                         | nindethana NS-<br>4869     | <b>KC283393</b> | <b>KC200771</b> | JQ942728        |                 | <b>KC284206</b> |                 |
| Acacia decora<br>Rchb.                                            | ANBG 643848                | <b>KC283296</b> | <b>KC200772</b> | JQ942572        | <b>KC421228</b> | <b>KC284207</b> | <b>KC958012</b> |

|                                                            |                    |                 |                 |                 |                 |                 |                 |
|------------------------------------------------------------|--------------------|-----------------|-----------------|-----------------|-----------------|-----------------|-----------------|
| Acacia decurrens Willd.                                    | MELU-SRA 06        | DQ489922        | <b>KC796216</b> | JQ248627        |                 | JQ248756        |                 |
| Acacia delibrata A.Cunn. ex Benth.                         | ATSC 17203         | <b>KC283344</b> | <b>KC200773</b> |                 | <b>KC421273</b> | <b>KC284208</b> | <b>KC958080</b> |
| Acacia delphina Maslin                                     | nindethana NS-576  | <b>KC283899</b> | <b>KC200774</b> | JQ943316        | <b>KC421934</b> | <b>KC284209</b> | <b>KC957936</b> |
| Acacia dempsteri F.Muell.                                  | CANB 680141        | JF420261        | JF420038        | <b>KF048760</b> | <b>KC957123</b> | <b>KC955784</b> | JF420474        |
| Acacia denticulosa F.Muell.                                | ATSC 17654s3       | <b>KC283335</b> | <b>KC200777</b> | JQ942635        | <b>KC421258</b> | <b>KC284215</b> | <b>KC958067</b> |
| Acacia desmondii Maslin                                    | J.T. Miller 1557   | <b>KC283822</b> | <b>KC200778</b> | JQ943230        | <b>KC421847</b> | <b>KC284216</b> | <b>KC957856</b> |
| Acacia diallaga Maslin & Buscumb                           | Paul Nevill KPPN49 | <b>KC283598</b> | <b>KC200779</b> |                 | <b>KC421532</b> | <b>KC796197</b> | JX870580        |
| Acacia dictyoneura E.Pritz.                                | nindethana NS-527  | <b>KC283321</b> | <b>KC200789</b> | JQ942616        |                 | <b>KC284217</b> | <b>KC958050</b> |
| Acacia dictyophleba F.Muell.                               | ATSC 13776s2       | <b>KC283339</b> |                 | JQ942640        | <b>KC421265</b> | <b>KC284218</b> | <b>KC958073</b> |
| Acacia didyma A.R.Chapm. & Maslin                          | MEL 2283488s2      |                 |                 | <b>KC796123</b> | <b>KF048663</b> | <b>KC284220</b> | <b>KC957758</b> |
| Acacia difficilis Maiden                                   | ATSC 19935         |                 |                 | JQ942903        | <b>KC421417</b> | <b>KC284222</b> | <b>KC958281</b> |
| Acacia dimidiata Benth.                                    | ATSC 15722         | <b>KC283895</b> | <b>KC200791</b> | JQ943311        | <b>KC421932</b> | <b>KC284224</b> |                 |
| Acacia diphylla Tindale                                    | CANB 633921        | JN935154        |                 |                 | JQ248694        | JQ248750        | JQ248822        |
| Acacia disparrima subsp. calidestris M.W.McDonald & Maslin | ATSC 13866         | <b>KC283548</b> | <b>KC200792</b> | JQ942974        | <b>KC421478</b> | <b>KC284225</b> | <b>KC958353</b> |
| Acacia distans Maslin                                      | CANB 633922        |                 | <b>KC200794</b> | JQ942556        | <b>KC421216</b> | <b>KC284227</b> | <b>KC958001</b> |
| Acacia dodonaeifolia (Pers.) Balb.                         | nindethana NS-8657 | JN006084        | JN006095        | JN006106        | JN006117        | JN006126        | JN006137        |
| Acacia dolichophylla Maslin                                | J.T. Miller 1564   | <b>KC283828</b> |                 | JQ943236        | <b>KC421853</b> | <b>KC284228</b> | <b>KC957862</b> |
| Acacia doratoxylon A.Cunn.                                 | ANBG 9406550       | <b>KC283306</b> | <b>KC200796</b> | JQ942588        | <b>KC421238</b> | <b>KC284230</b> | <b>KC958023</b> |
| Acacia dorothea Maiden                                     | Clarke 40d         | JF420232        |                 | JF420339        | <b>KC421348</b> | <b>KC796182</b> | JF420450        |
| Acacia drepanocarpa subsp. latifolia Pedley                | ATSC 14653         | <b>KC283498</b> |                 | JQ942913        | KC421424        | <b>KC284233</b> | <b>KC958291</b> |
| Acacia drepanophylla Maslin                                | CANB 333148        | <b>KC283654</b> |                 | JQ943101        | <b>KC421583</b> | <b>KC284234</b> |                 |

|                                                           |                          |                 |                 |                 |                 |                 |                 |
|-----------------------------------------------------------|--------------------------|-----------------|-----------------|-----------------|-----------------|-----------------|-----------------|
| Acacia<br>drummondii<br>subsp. affinis<br>(Maslin) Maslin | ATSC 13650               | <b>KC283371</b> | <b>KC200799</b> | JQ942679        | <b>KC421308</b> | <b>KC284235</b> |                 |
| Acacia dunnii<br>(Maiden) Turrill                         | ATSC 11482               | <b>KC283351</b> | <b>KC200800</b> | JQ942655        | <b>KC421282</b> | <b>KC284236</b> | <b>KC958085</b> |
| Acacia elachantha<br>Maslin &<br>M.W.McDonald             | ATSC 14634               | <b>KC283547</b> | <b>KC200801</b> | JQ942973        | <b>KC421477</b> | <b>KC284237</b> | <b>KC958352</b> |
| Acacia elata<br>A.Cunn. ex<br>Benth.                      | ANBG 632927              | JF420262        | JF420039        | JF420368        | JF419938        | JF420149        | JF420475        |
| Acacia elongata<br>Sieber ex DC.                          | Clarke 27e               | JF420296        |                 | JF420405        | <b>KC421335</b> | <b>KC796181</b> | JF420508        |
| Acacia<br>empelioclada<br>Maslin                          | JMseed 1549              |                 |                 | <b>KC796136</b> | <b>KC421777</b> | <b>KC284243</b> | <b>KC957781</b> |
| Acacia enervia<br>Maiden &<br>Blakely                     | nindethana NS-<br>13209  | JN935155        | JQ248877        | JQ248628        | JQ248695        | JQ248751        | JQ248823        |
| Acacia<br>enterocarpa<br>R.V.Sm.                          | nindethana NS-<br>17107  | <b>KC283394</b> | <b>KC200806</b> | JQ942729        | <b>KC421355</b> | <b>KC284244</b> |                 |
| Acacia epacantha<br>(Maslin) Maslin                       | CANB 623291              |                 | JF420040        | JF420369        | JF419939        | JF420150        | JF420476        |
| Acacia eriopoda<br>Maiden &<br>Blakely                    | ATSC 15740               | <b>KC283896</b> | <b>KC200807</b> | JQ943313        | <b>KC421933</b> | <b>KC284245</b> | <b>KC957933</b> |
| Acacia errabunda<br>Maslin                                | CANB 472419              | <b>KC283878</b> | <b>KC200808</b> | JQ943279        | <b>KC421911</b> | <b>KC284246</b> |                 |
| Acacia<br>estrophiolata<br>F.Muell.                       | J.T. Miller 1561         | <b>KC283826</b> | <b>KC200812</b> | JQ943234        | <b>KC421851</b> | <b>KC284251</b> | <b>KC957860</b> |
| Acacia euthycarpa<br>(J.M.Black)<br>J.M.Black             | JMseed 1553              | JF420282        | JF420060        | JF420391        | <b>KC421268</b> | <b>KC796174</b> | JF420498        |
| Acacia excelsa<br>Benth.                                  | Mount Annan<br>BG 861726 | <b>KC283464</b> |                 | JQ942864        |                 | <b>KC284254</b> | <b>KC958249</b> |
| Acacia excentrica<br>Maiden &<br>Blakely                  | CANB 7900384             | <b>KC283877</b> | <b>KC200813</b> | JQ943278        | <b>KC421910</b> | <b>KC284255</b> | <b>KC957913</b> |
| Acacia exilis<br>Maslin                                   | ATSC 16817               | <b>KC283519</b> | <b>KC200814</b> | JQ942942        | <b>KC421448</b> | <b>KC284256</b> | <b>KC958321</b> |
| Acacia extensa<br>Lindl.                                  | JMseed 1555              | JF420281        | <b>KF048784</b> | JF420390        | <b>KC421267</b> | <b>KC796173</b> | JF420497        |
| Acacia fagonioides<br>Benth.                              | CANB 7901843             |                 |                 | JQ943276        | <b>KC421908</b> | <b>KC284257</b> |                 |
| Acacia falcata<br>Willd.                                  | CANB 681537              | <b>KC283447</b> | <b>KC200816</b> | JQ942843        |                 | <b>KC284261</b> | <b>KC958228</b> |
| Acacia falciformis<br>DC.                                 | ATSC 16253s2             | JN935157        | JQ248878        | JQ248630        | JQ248696        | JQ248752        | JQ248825        |
| Acacia faucium<br>Pedley                                  | ATSC 18475               | <b>KC283538</b> | <b>KC200817</b> | JQ942964        | <b>KC421468</b> | <b>KC284262</b> | <b>KC958343</b> |
| Acacia fecunda<br>Maslin                                  | CANB 712757              | <b>KC283876</b> | <b>KC200818</b> | JQ943275        | <b>KC421907</b> | <b>KC284263</b> | <b>KC957912</b> |
| Acacia filicifolia<br>Cheel &<br>M.B.Welch                | Clarke F                 | JN935150        | <b>KC200819</b> | JQ942683        | JQ248689        | JQ248745        |                 |

|                                                |                            |                 |                 |                 |                 |                 |                 |
|------------------------------------------------|----------------------------|-----------------|-----------------|-----------------|-----------------|-----------------|-----------------|
| Acacia fimbriata<br>A.Cunn. ex<br>G.Don        | ANBG 9707232               | <b>KC283297</b> | <b>KC200820</b> | JF420370        | <b>KC421229</b> | <b>KC284265</b> | <b>KC958014</b> |
| Acacia flexifolia<br>A.Cunn. ex<br>Benth.      | Clarke 6f                  | JF420234        | JQ248879        | JF420341        | JQ248697        | JQ248761        | JF420452        |
| Acacia floribunda<br>(Vent.) Willd.            | Clarke 7fl                 | JF420235        | JQ248880        | JF420342        | JQ248698        | JQ248762        | JF420453        |
| Acacia fragilis<br>Maiden &<br>Blakely         | ANBG<br>7900604s2          |                 | <b>KC200823</b> | <b>KC796137</b> | <b>KC421778</b> | <b>KF048567</b> | <b>KC957782</b> |
| Acacia fulva<br>Tindale                        | MELU-SRA 30                | DQ489927        | <b>KC796214</b> | JQ942801        | <b>KC421399</b> | <b>KC284269</b> | <b>KC958193</b> |
| Acacia gardneri<br>Maiden &<br>Blakely         | CANB 6702465               | <b>KC283875</b> | <b>KC200828</b> | JQ943274        | <b>KC421906</b> | <b>KC284273</b> | <b>KC957911</b> |
| Acacia gelasina<br>Maslin                      | MELU-SRA 97                | DQ029292        | <b>KC796225</b> | JQ942823        | <b>KC421411</b> | <b>KC284274</b> |                 |
| Acacia genistifolia<br>Link                    | ATSC 9968                  | JF420242        | JF420019        | JF420348        | JF419917        | JF420128        | JF420454        |
| Acacia georginae<br>F.M.Bailey                 | J.T. Miller 1571           | <b>KC283835</b> | <b>KC200831</b> | JQ943244        | <b>KC421861</b> | <b>KC284276</b> | <b>KC957870</b> |
| Acacia gilbertii<br>Meisn.                     | Kings Park BG<br>19930120  | <b>KC283313</b> | <b>KC200832</b> | JQ942605        |                 | <b>KC284277</b> |                 |
| Acacia gillii<br>Maiden &<br>Blakely           | ANBG 8910375               | <b>KC283343</b> | <b>KC200833</b> | JQ942647        | <b>KC421272</b> | <b>KC284278</b> | <b>KC958079</b> |
| Acacia gittinsii<br>Pedley                     | CANB 950398                |                 | <b>KC200834</b> | <b>KC796138</b> | <b>KC421779</b> | <b>KC284280</b> | <b>KC957783</b> |
| Acacia<br>gladiiformis<br>A.Cunn. ex<br>Benth. | CANB 633950                | <b>KC283276</b> | <b>KC200835</b> | JQ942537        | <b>KC421206</b> | <b>KC284281</b> | <b>KC957985</b> |
| Acacia glaucissima<br>Maslin                   | nindethana NS-<br>9918     | <b>KC283357</b> | <b>KC200836</b> | JQ942665        | <b>KC421293</b> | <b>KC284282</b> | <b>KC958089</b> |
| Acacia<br>glaucocarpa<br>Maiden &<br>Blakely   | Mount Annan<br>BG 842528   | <b>KC283423</b> | <b>KC200840</b> | JQ942768        | <b>KC421376</b> | <b>KC284287</b> | <b>KC958167</b> |
| Acacia<br>glaucoptera<br>Benth.                | Mount Annan<br>BG 901313   | <b>KC283430</b> | <b>KC200841</b> | JQ942776        | <b>KC421381</b> | <b>KC284288</b> | <b>KC958175</b> |
| Acacia gnidium<br>Benth.                       | JMseed 1567                | <b>KC283340</b> | <b>KC200842</b> | JQ942644        | <b>KC421269</b> | <b>KC284289</b> | <b>KC958077</b> |
| Acacia gonocarpa<br>F.Muell.                   | nindethana NS-<br>17685    | <b>KC283396</b> | <b>KC200843</b> | JQ942732        |                 | <b>KC284290</b> |                 |
| Acacia gonoclada<br>F.Muell.                   | ATSC 14721                 | <b>KC283266</b> | <b>KC200844</b> | JQ942514        | <b>KC421192</b> | <b>KC284291</b> | <b>KC957973</b> |
| Acacia gonophylla<br>Benth.                    | Mount Annan<br>BG 852718s2 | <b>KC283478</b> | <b>KC200845</b> | JQ942884        |                 | <b>KC284292</b> |                 |
| Acacia gracillima<br>Tindale                   | ATSC 18811                 |                 | <b>KC200846</b> | JQ942953        | <b>KC421457</b> | <b>KC284293</b> | JF420538        |
| Acacia grandifolia<br>Pedley                   | ATSC 17026s2               | <b>KC283278</b> | <b>KC200848</b> | JQ942539        | <b>KC421208</b> | <b>KC284295</b> | <b>KC957987</b> |
| Acacia grasbyi<br>Maiden                       | CANB 371455                | JN935161        |                 | JQ248634        | JQ248698        | JQ248754        |                 |
| Acacia gregorii<br>F.Muell.                    | ATSC 16823                 |                 |                 | JQ942916        | <b>KC421426</b> | <b>KC284297</b> | <b>KC958294</b> |

|                                                       |                          |                 |                 |                 |                 |                 |                 |
|-------------------------------------------------------|--------------------------|-----------------|-----------------|-----------------|-----------------|-----------------|-----------------|
| Acacia guinetii<br>Maslin                             | nindethana NS-1404       |                 |                 | JF420397        | <b>KC421309</b> | <b>KC796177</b> | JF420500        |
| Acacia hakeoides<br>A.Cunn. ex<br>Benth.              | Clarke 19h               | JF420228        | JQ248882        | JF420335        | JQ248701        | JQ248765        | JF420447        |
| Acacia halliana<br>Maslin                             | ANBG 8210014             | <b>KC283279</b> | <b>KC200849</b> | JQ942541        | <b>KC421209</b> | <b>KC284300</b> | <b>KC957988</b> |
| Acacia<br>hamersleyensis<br>Maslin                    | ATSC 16818               | <b>KC283327</b> | <b>KC200850</b> | JQ942623        |                 | <b>KC284301</b> |                 |
| Acacia hammondii<br>Maiden                            | ATSC 15714               | JF420318        | JF420096        | JF420430        | JF419991        | JF420211        | JF420532        |
| Acacia<br>harpophylla<br>F.Muell. ex<br>Benth.        | ANBG 9611061             | <b>KC283298</b> | <b>KC200851</b> | JQ942578        | <b>KC421230</b> | <b>KC284302</b> | <b>KC958015</b> |
| Acacia harveyi<br>Benth.                              | CANB 633960              | <b>KC283280</b> | <b>KC200852</b> | JQ942542        | <b>KC421210</b> | <b>KC284305</b> | <b>KC957989</b> |
| Acacia hastulata<br>Sm.                               | nindethana NS-7606       | <b>KC283397</b> | <b>KC200853</b> | JQ942733        | <b>KC421357</b> | <b>KC284306</b> | <b>KC958145</b> |
| Acacia<br>haviandiorum<br>Maiden                      | Mount Annan<br>BG 842276 | <b>KC283489</b> | <b>KC200856</b> | JQ942900        |                 | <b>KC284309</b> | <b>KC958279</b> |
| Acacia hemiteles<br>Benth.                            | nindethana NS-03463      |                 | <b>KC200857</b> | JQ942735        |                 | <b>KC284310</b> |                 |
| Acacia hemsleyi<br>Maiden                             | ATSC 15713               | <b>KC796098</b> |                 | JQ942521        | <b>KC421198</b> | <b>KC284312</b> | <b>KC957976</b> |
| Acacia<br>heterochroa<br>Maslin subsp.<br>heterochroa | CANB 744632              | <b>KC283873</b> | <b>KC200860</b> | <b>KC796159</b> | <b>KC421904</b> | <b>KC284314</b> | <b>KC957909</b> |
| Acacia heteroclita<br>Meisn.                          | JMseed 1575              | JF420275        | <b>KF048782</b> | JF420384        | <b>KC421254</b> | <b>KC796170</b> | JF420491        |
| Acacia hexaneura<br>P.J.Lang &<br>R.S.Cowan           | nindethana NS-17117      | <b>KC283398</b> | <b>KC200861</b> | JQ942736        | <b>KC421358</b> | <b>KC284316</b> | <b>KC958147</b> |
| Acacia hilliana<br>Maiden                             | ATSC 18464               | <b>KC283514</b> | <b>KC200862</b> | JQ942937        | <b>KC421444</b> | <b>KC284317</b> | <b>KC958316</b> |
| Acacia holosericea<br>A.Cunn. ex<br>G.Don             | ATSC 15669               | JF420240        |                 | JF420346        | JF419916        | JF420126        |                 |
| Acacia hopperiana<br>Maslin                           | CANB 522313              | <b>KC283872</b> | <b>KC200864</b> | JQ943273        | <b>KC421903</b> | <b>KC284319</b> | <b>KC957908</b> |
| Acacia howittii<br>F.Muell.                           | nindethana NS-17591      | JF420301        |                 | JF420410        | JF419977        | JF420190        | JF420512        |
| Acacia huegelii<br>Benth.                             | CANB 385261              | <b>KC283870</b> | <b>KC200866</b> | JQ943271        | <b>KC421901</b> | <b>KC284321</b> | <b>KC957906</b> |
| Acacia hylonoma<br>Pedley                             | ATSC 16231               | <b>KC283555</b> | <b>KC200867</b> | JQ942983        | <b>KC421484</b> | <b>KC284322</b> | JF420539        |
| Acacia<br>hypermeceas<br>A.S.George                   | CANB 550913              | <b>KC283868</b> | <b>KC200868</b> | JQ943270        | <b>KC421900</b> | <b>KC284323</b> | <b>KC957904</b> |
| Acacia hystrix<br>Maslin                              | nindethana NS-16895      | <b>KC283399</b> | <b>KC200869</b> | JQ942737        | <b>KC421359</b> | <b>KC284324</b> | <b>KC958148</b> |
| Acacia imbricata<br>F.Muell.                          | nindethana NS-7200       | <b>KC283488</b> | <b>KC200870</b> | JQ942899        |                 | <b>KC284325</b> | <b>KC958278</b> |
| Acacia implexa<br>Benth.                              | Clarke 11i               | <b>KF048825</b> |                 | <b>KF048761</b> | <b>KC421322</b> | <b>KC796179</b> | <b>KC958111</b> |



|                                                                |                            |                 |                 |                 |                 |                 |                 |
|----------------------------------------------------------------|----------------------------|-----------------|-----------------|-----------------|-----------------|-----------------|-----------------|
| Acacia<br>inaequilatera<br>Domin                               | ATSC 19193                 | <b>KC283523</b> |                 | JQ942946        |                 | <b>KC284332</b> | <b>KC958325</b> |
| Acacia inceana<br>subsp.<br>conformis<br>R.S.Cowan &<br>Maslin | CANB 00511255              | JN935165        | JQ248883        | JQ248639        | JQ248702        | JQ248758        | JQ248831        |
| Acacia incrassata<br>Hook.                                     | CANB 504759                |                 | <b>KC200874</b> |                 | <b>KC421896</b> | <b>KC284334</b> | <b>KC957900</b> |
| Acacia ingramii<br>Tindale                                     | ANBG<br>B9707225           | <b>KC283299</b> | <b>KC200877</b> | JQ942579        | <b>KC421231</b> |                 | <b>KC958016</b> |
| Acacia irrorata<br>Sieber ex<br>Spreng. subsp.<br>irrorata     | ATSC 18625                 | <b>KC283504</b> | <b>KC200879</b> | JQ942924        | <b>KC421434</b> | <b>KC284341</b> | <b>KC958303</b> |
| Acacia iteaphylla<br>F.Muell. ex<br>Benth.                     | nindethana NS-<br>8390     | <b>KC283400</b> | <b>KC200881</b> | JQ942738        | <b>KC421360</b> |                 | <b>KC958149</b> |
| Acacia ixiophylla<br>Benth.                                    | JMseed 1587                | JF420276        | <b>KC796206</b> |                 | <b>KC421256</b> | <b>KC796171</b> | JF420492        |
| Acacia ixodes<br>Pedley                                        | JMseed 1588                | <b>KC283401</b> | <b>KC200882</b> | JQ942739        | <b>KC421361</b> | <b>KC284343</b> | <b>KC958150</b> |
| Acacia<br>jacksonioides<br>Maslin                              | CANB 439681                | <b>KC283865</b> | <b>KC200883</b> | JQ943268        | <b>KC421895</b> | <b>KC284344</b> | <b>KC957899</b> |
| Acacia jamesiana<br>Maslin                                     | JMseed 1589                | <b>KC283395</b> | <b>KC200884</b> | JQ942731        | <b>KC421356</b> | <b>KC284345</b> | <b>KC958144</b> |
| Acacia jennerae<br>Maiden                                      | ATSC 19043                 | <b>KC283532</b> | <b>KC200885</b> | JQ942960        | <b>KC421462</b> | <b>KC284346</b> | <b>KC958338</b> |
| Acacia jensenii<br>Maiden                                      | nindethana NS-<br>5460     | <b>KC595996</b> |                 | <b>KC598182</b> | <b>KC610563</b> | <b>KC598189</b> | <b>KC610558</b> |
| Acacia<br>jibberdingensis<br>Maiden &<br>Blakely               | Paul Nevill<br>KPPN91      | JN006086        | JN006097        | JN006108        | JN006119        | JN006128        | JN006138        |
| Acacia jonesii<br>F.Muell. &<br>Maiden                         | Mount Annan<br>BG 20051433 | <b>KC283484</b> |                 | JQ942894        |                 | <b>KC284349</b> |                 |
| Acacia jucunda<br>Maiden &<br>Blakely                          | nindethana NS-<br>15445    | <b>KC283356</b> | <b>KC200891</b> | JQ942664        | <b>KC421292</b> | <b>KC284350</b> |                 |
| Acacia julifera<br>Benth. subsp.<br>julifera                   | ATSC 16669                 | <b>KC283526</b> | <b>KC200892</b> | JQ942951        | <b>KC421455</b> | <b>KC284351</b> | <b>KC958330</b> |
| Acacia karina<br>Maslin &<br>Buscumb                           | Paul Nevill<br>KPPN83      | <b>KC796100</b> | <b>KC796203</b> | JX402772        | <b>KC013773</b> | <b>KC955885</b> | JX870609        |
| Acacia kempeana<br>F.Muell.                                    | J.T. Miller 1567           | <b>KC283831</b> |                 | JQ943240        | <b>KC421857</b> | <b>KC284352</b> | <b>KC957866</b> |
| Acacia<br>kybeanensis<br>Maiden &<br>Blakely                   | nindethana<br>N/C-01736    | <b>KC283402</b> |                 |                 |                 | <b>KC284353</b> | <b>KC958151</b> |
| Acacia<br>lamprocarpa<br>O.Schwarz                             | ATSC 18227                 | <b>KC283529</b> | <b>KC200902</b> | JQ942957        | <b>KC421459</b> | <b>KC284355</b> | <b>KC958336</b> |

|                                                               |                            |                 |                 |                 |                 |                 |                       |
|---------------------------------------------------------------|----------------------------|-----------------|-----------------|-----------------|-----------------|-----------------|-----------------------|
| Acacia lasiocalyx<br>C.R.P.Andrews                            | ATSC 17648                 | JF420251        | JF420027        | JF420357        | JF419926        | JF420137        | JF420463              |
| Acacia latescens<br>Benth.                                    | ATSC 18415                 | <b>KC283533</b> | <b>KC200903</b> | JQ942961        | <b>KC421463</b> | <b>KC284356</b> | <b>KC958339</b>       |
| Acacia latipes<br>Benth.                                      | Kings Park BG<br>19740314  | <b>KC283362</b> | <b>KC200904</b> | JQ942669        | <b>KC421297</b> | <b>KC284357</b> | <b>KC958091</b>       |
| Acacia latisepala<br>Pedley                                   | I.R.Thompson<br>537        | DQ489931        | <b>KC796217</b> | JQ942810        | <b>KC421403</b> | <b>KC284358</b> | <b>KC958200</b>       |
| Acacia latzii<br>Maslin                                       | J.T. Miller 1553           | <b>KC283818</b> | <b>KC200906</b> | JQ943226        | <b>KC421843</b> | <b>KC284360</b> | <b>KC957853</b>       |
| Acacia leiocalyx<br>(Domin) Pedley                            | Clarke 25L                 | <b>KC283381</b> | <b>KC200908</b> |                 | <b>KC421333</b> | <b>KC284362</b> | <b>KC958123</b>       |
| Acacia leioderma<br>Maslin                                    | nindethana NS-<br>7566     | JF420286        | JF420064        | JF420394        | <b>KC421288</b> | <b>KC796175</b> |                       |
| Acacia leptocarpa<br>A.Cunn. ex<br>Benth.                     | ATSC 15478s2               | JN006088        | JN006099        | JN006110        |                 | JN006130        | JN006139              |
| Acacia leptoneura<br>Benth.                                   | JMseed 1604                | <b>KC283403</b> |                 | JQ942740        |                 | <b>KC284364</b> |                       |
| Acacia leucoclada<br>Tindale                                  | ANBG 9611065               | <b>KC283300</b> | <b>KC200909</b> | JQ942580        | <b>KC421232</b> | <b>KC284365</b> | <b>KC958017</b>       |
| Acacia leucolobia<br>Sweet                                    | Mount Annan<br>BG 20011136 | <b>KC283421</b> | <b>KC200914</b> | JQ942766        | <b>KC421374</b> | <b>KC284371</b> |                       |
| Acacia ligulata<br>A.Cunn. ex<br>Benth.                       | MEL 2326228                |                 | <b>KC200918</b> | <b>KC796111</b> | <b>KF048635</b> | <b>KC284375</b> | <b>KC957706</b>       |
| Acacia linearifolia<br>A.Cunn. ex<br>Maiden &<br>Blakely      | Mount Annan<br>BG 884116   | <b>KC283473</b> | <b>KC200920</b> | JQ942877        |                 | <b>KC284377</b> | <b>KC958262</b>       |
| Acacia lineata<br>A.Cunn. ex<br>G.Don                         | Mount Annan<br>BG 842542   | JF420302        | JF420080        | JF420411        | <b>KF048612</b> | JF420191        | JF420513              |
| Acacia lineolata<br>Benth.                                    | ATSC 17640                 |                 |                 | <b>KC796139</b> | <b>KC421782</b> | <b>KC284380</b> | <b>KC957786</b>       |
| Acacia linifolia<br>(Vent.) Willd.                            | ANBG9409682                | JF420264        | JF420043        | JF420373        | JF419942        | JF420153        | JF420479              |
| Acacia loderi<br>Maiden                                       | CBG 9518143                | JN935167        | JQ248886        | JQ248642        | JQ248705        | JQ248761        | JQ248834              |
| Acacia longifolia<br>(Andrews)<br>Willd. subsp.<br>longifolia | Clarke 5L                  | <b>KC283376</b> | <b>KC200925</b> |                 | <b>KC421317</b> | <b>KC284385</b> | <b>KC958105</b>       |
| Acacia<br>longispicata<br>Benth.                              | CANB 633993                | <b>KC283281</b> | <b>KC200926</b> | JQ942545        | <b>KC421211</b> | <b>KC284386</b> | <b>KC957990</b>       |
| Acacia longispinea<br>Morrison                                | MEL 2039636                | DQ029287        | <b>KC796224</b> |                 | <b>KC421409</b> |                 |                       |
| Acacia longissima<br>Hort. ex<br>H.L.Wendl.                   | ATSC 7168                  | JF420316        | JF420094        | JF420428        | <b>KF048619</b> | <b>KC796191</b> | JF420530              |
| Acacia loroloba<br>Tindale                                    | MEL 2083992                | DQ489934        | <b>KC796218</b> | JQ942811        | <b>KC421404</b> | <b>KC284387</b> |                       |
| Acacia<br>lycopodiifolia<br>A.Cunn. ex<br>Hook.               | CANB 615616                |                 | AF360716        |                 | <b>KF048587</b> | AF195715        | AF195686;<br>AF195705 |

|                                              |                            |                 |                 |                 |                 |                 |                 |
|----------------------------------------------|----------------------------|-----------------|-----------------|-----------------|-----------------|-----------------|-----------------|
| Acacia lysiphloia<br>F.Muell.                | CANB 668940                | <b>KC283680</b> |                 | JQ943133        | <b>KC421607</b> | <b>KC284390</b> | <b>KC957625</b> |
| Acacia mabellae<br>Maiden                    | CANB 00590399              | <b>KC283662</b> | <b>KC200930</b> | JQ943110        | <b>KC421591</b> | <b>KC284394</b> | <b>KC957610</b> |
| Acacia<br>macdonnellensis<br>Maconochie      | nindethana NS-<br>8482     | JN935170        | JQ248889        | JQ248644        | JQ248708        | JQ248764        | JQ248837        |
| Acacia mackeyana<br>Ewart & Jean<br>White    | CANB 00439649              | JN935171        | JQ248890        | JQ248645        | JQ248709        | JQ248765        | JQ248838        |
| Acacia<br>macnuttiana<br>Maiden &<br>Blakely | Mount Annan<br>BG 20061207 | <b>KC283490</b> | <b>KC200932</b> | JQ942901        |                 | <b>KC284397</b> |                 |
| Acacia<br>maconochieana<br>Pedley            | J.T. Miller 1550           | <b>KC283815</b> | <b>KC200933</b> | JQ943223        | <b>KC421840</b> | <b>KC284398</b> | <b>KC957850</b> |
| Acacia<br>macradenia<br>Benth.               | M.E. Ballingall<br>2726    | <b>KC283338</b> | <b>KC200935</b> | JQ942637        | <b>KC421261</b> | <b>KC284400</b> | <b>KC958069</b> |
| Acacia maitlandii<br>F.Muell.                | ATSC 16784                 | <b>KC283550</b> | <b>KC200937</b> | JQ942976        | <b>KC421480</b> | <b>KC284404</b> | <b>KC958354</b> |
| Acacia mangium<br>Willd.                     | ATSC 20045                 |                 | <b>KC200938</b> | JQ942921        | <b>KC421430</b> | <b>KC284407</b> | <b>KC958299</b> |
| Acacia<br>maranoensis<br>Pedley              | CBG 8400135                | JN935172        |                 | JQ248646        | JQ248710        | JQ248766        | JQ248839        |
| Acacia<br>marramamba<br>Maslin               | MEL 2313078                | <b>KC283748</b> | <b>KC200940</b> | <b>KC796112</b> | <b>KF048637</b> | <b>KC284409</b> | <b>KC957708</b> |
| Acacia masliniana<br>R.S.Cowan               | CANB 0472301               | JN935173        |                 | JQ248647        | JQ248711        | JQ248767        | JQ248840        |
| Acacia mearnsii<br>De Wild.                  | ATSC 15329                 | JF420284        | <b>KF048786</b> | JF420393        | <b>KC421286</b> | JF420174        |                 |
| Acacia meisneri<br>Lehm. ex<br>Meisn.        | ANBG 9009662               | JF420271        | JF420049        | JF420380        |                 | JF420161        | <b>KC958044</b> |
| Acacia<br>melanoxylon<br>R.Br.               | Mount Annan<br>BG 860538   | JF420314        | JF420093        | JF420425        | <b>KF048618</b> | <b>KC796190</b> | JF420527        |
| Acacia melleodora<br>Pedley                  | J.T. Miller 1575           | <b>KC283839</b> | <b>KC200945</b> | JQ943248        | <b>KC421865</b> | <b>KC284416</b> | <b>KC957874</b> |
| Acacia melvillei<br>Pedley                   | CANB 00509593              | <b>KC283683</b> | <b>KC200947</b> | JQ943138        | <b>KC421612</b> |                 | <b>KC957629</b> |
| Acacia menzliei<br>J.M.Black                 | ANBG 9514456               | <b>KC283301</b> | <b>KC200948</b> | JQ942582        | <b>KC421233</b> | <b>KC284423</b> | <b>KC958018</b> |
| Acacia<br>microbotrya<br>Benth.              | CANB 693658                | <b>KC283453</b> | <b>KC200949</b> | JQ942851        |                 | <b>KC284424</b> | <b>KC958235</b> |
| Acacia<br>microbotrya<br>Benth.              | CANB 00585265              |                 |                 | <b>KC796147</b> | <b>KC421796</b> | <b>KC284049</b> |                 |
| Acacia<br>microsperma<br>Pedley              | CANB 337329                | JN935176        |                 | JQ248650        | JQ248714        | JQ248770        | JQ248843        |
| Acacia midgleyi<br>M.W.McDonald<br>& Maslin  | ATSC 19729                 | <b>KC283503</b> | <b>KC200951</b> | JQ942923        | <b>KC421433</b> | <b>KC284429</b> | <b>KC958302</b> |

|                                                                    |                         |                 |                 |                 |                 |                 |                 |
|--------------------------------------------------------------------|-------------------------|-----------------|-----------------|-----------------|-----------------|-----------------|-----------------|
| Acacia minyura<br>Randell                                          | B.R. Maslin<br>9297     | <b>KC283911</b> | <b>KC200954</b> | <b>KC796161</b> | <b>KC421949</b> | <b>KC284435</b> | <b>KC957951</b> |
| Acacia mitchellii<br>Benth.                                        | MEL 2018082             | DQ489937        | <b>KC796212</b> | JQ942799        | <b>KC421397</b> | <b>KC284437</b> | <b>KC958191</b> |
| Acacia mollifolia<br>Maiden &<br>Blakely                           | ANBG 7804390            |                 | <b>KC200956</b> | JQ942583        | <b>KC421234</b> | <b>KC284438</b> | <b>KC958020</b> |
| Acacia montana<br>Benth.                                           | Clarke 32m              | JF420297        |                 | JF420406        | <b>KC421340</b> | JF420186        | <b>KC958128</b> |
| Acacia monticola<br>J.M.Black                                      | Leg. ign. s.n. 36       | <b>KC283255</b> | <b>KC200958</b> | JQ942493        |                 |                 |                 |
| Acacia<br>mountfordiae<br>Specht                                   | ATSC 16956              | <b>KC283265</b> | <b>KC200959</b> | JQ942511        | <b>KC421190</b> | <b>KC284441</b> | <b>KC957972</b> |
| Acacia mucronata<br>Willd. ex<br>H.L.Wendl.<br>subsp.<br>mucronata | CANB 615743             | <b>KF048824</b> | JF420107        | <b>KF048759</b> | <b>KF048597</b> |                 | <b>KC957931</b> |
| Acacia<br>muelleriana<br>Maiden &<br>R.T.Baker                     | CANB 634004             | JF420252        | JF420029        | JF420359        | <b>KF048604</b> | JF420139        | JF420465        |
| Acacia multisiliqua<br>(Benth.)<br>Maconochie                      | ATSC 20363              | <b>KC283502</b> |                 | <b>KC796103</b> | <b>KC421431</b> | <b>KC284446</b> | <b>KC958300</b> |
| Acacia<br>multispicata<br>Benth.                                   | ANBG<br>9710019s2       | JF420253        | JF420030        | JF420360        | <b>KF048605</b> | JF420140        | JF420466        |
| Acacia murrayana<br>F.Muell. ex<br>Benth.                          | J.T. Miller 1558        | <b>KC283823</b> | <b>KC200962</b> | JQ943231        | <b>KC421848</b> | <b>KC284449</b> | <b>KC957857</b> |
| Acacia myrtifolia<br>(Sm.) Willd.                                  | Clarke 23m              | JN935177        | JQ248891        | JQ248651        | JQ248715        | JQ248771        | JQ248844        |
| Acacia<br>nanodealbata<br>J.H.Willis                               | ATSC 17195              | <b>KC283348</b> | <b>KC200963</b> | JQ942652        | <b>KC421279</b> | <b>KC284451</b> |                 |
| Acacia<br>nematophylla<br>F.Muell. ex<br>Benth.                    | nindethana NS-<br>10656 | <b>KC283354</b> | <b>KC200965</b> | JQ942662        | <b>KC421290</b> | <b>KC284453</b> |                 |
| Acacia neriifolia<br>A.Cunn. ex<br>Benth.                          | Clarke 8n               | JF420291        |                 | JF420400        | <b>KC421320</b> | JF420181        | <b>KC958108</b> |
| Acacia neurocarpa<br>A.Cunn. ex<br>Hook.                           | ATSC 18170              |                 |                 | JQ942512        | <b>KC421191</b> | <b>KC284456</b> |                 |
| Acacia<br>neurophylla<br>W.Fitzg.                                  | JMseed 1623             | JN935178        | JQ248892        | JQ248652        | JQ248716        | JQ248772        | JQ248845        |
| Acacia nigricans<br>(Labill.) R.Br.                                | nindethana NS-<br>2315  | <b>KC283350</b> | <b>KC200966</b> | JQ942654        | <b>KC421281</b> | <b>KC284457</b> |                 |
| Acacia notabilis<br>F.Muell.                                       | ATSC 19341              |                 | <b>KC200967</b> | <b>KC796140</b> | <b>KC421783</b> | <b>KC284458</b> | <b>KC957787</b> |
| Acacia nuperrima<br>subsp. cassitera<br>Pedley                     | CANB 615578s2           | <b>KC283404</b> | <b>KC200968</b> | JQ942743        |                 |                 | <b>KC958154</b> |

|                                               |                              |                 |                 |                 |                 |                 |                       |
|-----------------------------------------------|------------------------------|-----------------|-----------------|-----------------|-----------------|-----------------|-----------------------|
| Acacia<br>nyssophylla<br>F.Muell.             | J.T. Miller 1546             | <b>KC283830</b> | <b>KC200970</b> | JQ943239        | <b>KC421856</b> | <b>KC284461</b> | <b>KC957865</b>       |
| Acacia<br>obliquinervia<br>Tindale            | ATSC 18070                   | <b>KC283346</b> | <b>KC200971</b> | JQ942650        | <b>KC421276</b> | <b>KC284462</b> | <b>KC958083</b>       |
| Acacia obtecta<br>Maiden &<br>Blakely         | nindethana NS-<br>6777       | <b>KC595994</b> | <b>KC955264</b> | <b>KC598181</b> |                 | <b>KC598186</b> |                       |
| Acacia obtusata<br>Sieber ex DC.              | ATSC 6867s2                  | <b>KC283509</b> | <b>KC200973</b> | JQ942929        | <b>KC421439</b> | <b>KC284465</b> | <b>KC958308</b>       |
| Acacia obtusifolia<br>A.Cunn.                 | nindethana NS-<br>9190       | <b>KC283342</b> | <b>KC200974</b> | JQ942646        | <b>KC421271</b> | <b>KC284466</b> | <b>KC958078</b>       |
| Acacia oldfieldii<br>F.Muell.                 | B.R. Maslin &<br>Byrne 7790B | <b>KC283326</b> | <b>KC200975</b> | JQ942622        |                 | <b>KC284469</b> | <b>KC958056</b>       |
| Acacia olgana<br>Maconochie                   | CANB 615676s2                | <b>KC283264</b> | <b>KC200976</b> | JQ942510        | <b>KC421189</b> | <b>KC284470</b> | <b>KC957971</b>       |
| Acacia olsenii<br>Tindale                     | MEL 2032993                  | DQ489942        | <b>KC796219</b> | JQ942812        |                 | <b>KC284473</b> | <b>KC958201</b>       |
| Acacia<br>omalophylla<br>A.Cunn. ex<br>Benth. | CANB 746628.1                |                 |                 | JQ943073        | <b>KF048625</b> | <b>KC284476</b> | <b>KC957583</b>       |
| Acacia<br>oncinocarpa<br>Benth.               | nindethana NS-<br>5669       | <b>KC283405</b> | <b>KC200982</b> | JQ942744        |                 |                 |                       |
| Acacia<br>oncinophylla<br>Lindl.              | nindethana NS-<br>14738      | <b>KC283330</b> | <b>KC200983</b> | JQ942626        |                 | <b>KC284481</b> | <b>KC958059</b>       |
| Acacia orites<br>Pedley                       | CANB 246276                  | JN935181        |                 | JQ248655        | JQ248720        | JQ248776        | JQ248848              |
| Acacia orthocarpa<br>F.Muell.                 | ANBG 8115714                 | <b>KC283282</b> | <b>KC200984</b> | JQ942548        | <b>KC421212</b> | <b>KC284483</b> | <b>KC957993</b>       |
| Acacia oshanesii<br>F.Muell. &<br>Maiden      | CANB 931496                  |                 | <b>KC200986</b> | <b>KC796141</b> | <b>KC421784</b> | <b>KC284488</b> |                       |
| Acacia oswaldii<br>F.Muell.                   | J.T. Miller 1543             | <b>KC283810</b> | <b>KC200987</b> | JQ943218        | <b>KC421836</b> | <b>KC284489</b> | <b>KC957845</b>       |
| Acacia oxyclada<br>F.Muell. ex<br>Benth.      | CBG 9009666                  | <b>KC283360</b> | <b>KC200990</b> | JQ942667        | <b>KC421295</b> |                 |                       |
| Acacia pachyacra<br>Maiden &<br>Blakely       | MELU-SRA 239                 | JF420306        | <b>KF048791</b> | JF420417        | <b>KF048616</b> | <b>KC796186</b> | JF420520              |
| Acacia pachycarpa<br>F.Muell. ex<br>Benth.    | ATSC 20081                   | JF420321        | <b>KC200991</b> | JQ942919        | JF419995        | JF420214        | JF420535              |
| Acacia<br>papyrocarpa<br>Benth.               | nindethana NS-<br>4312       | JN935182        |                 | JQ248895        | JQ248656        | JQ248721        | JQ248777              |
| Acacia paradoxa<br>DC.                        | CANB 634019                  |                 | AF360717        |                 |                 | AF195717        | AF195678;<br>AF195697 |
| Acacia paraneura<br>Randell                   | J.T. Miller 1530             | <b>KC283802</b> | <b>KC200993</b> | JQ943208        | <b>KC421826</b> | <b>KC284494</b> | <b>KC957836</b>       |
| Acacia<br>parramattensis<br>Tindale           | ATSC 17925                   | <b>KC283536</b> | <b>KC200994</b> | JQ942963        | <b>KC421466</b> | <b>KC284496</b> | <b>KC958341</b>       |

|                                                    |                            |                 |                 |                 |                 |                 |                 |
|----------------------------------------------------|----------------------------|-----------------|-----------------|-----------------|-----------------|-----------------|-----------------|
| Acacia<br>parvipinnula<br>Tindale                  | ATSC 15842                 | <b>KC283283</b> | <b>KC200995</b> | JQ942550        | <b>KC421213</b> | <b>KC284497</b> | <b>KC957995</b> |
| Acacia patagiata<br>R.S.Cowan &<br>Maslin          | nindethana NS-<br>2050     | <b>KC283355</b> | <b>KC200996</b> | JQ942663        | <b>KC421291</b> |                 | <b>KC958088</b> |
| Acacia pedina<br>Kodela & Tame                     | Mount Annan<br>BG 991100   | <b>KC283476</b> | <b>KC200998</b> | JQ942882        |                 | <b>KC284498</b> | <b>KC958266</b> |
| Acacia pedleyi<br>Tindale &<br>Kodela              | MEL 717511                 | DQ489946        | <b>KC796220</b> | JQ942814        |                 | <b>KC284499</b> | <b>KC958203</b> |
| Acacia pellita<br>O.Schwarz                        | nindethana NS-<br>4670     | <b>KC283320</b> | <b>KC200999</b> | JQ942615        |                 | <b>KC284500</b> | <b>KC958049</b> |
| Acacia pendula<br>A.Cunn. ex<br>G.Don              | MEL 2233883                | <b>KC283756</b> | <b>KC201000</b> | <b>KC796113</b> | <b>KF048643</b> | <b>KC284502</b> | <b>KC957716</b> |
| Acacia<br>penninervis<br>Sieber ex DC.             | ATSC 15592s2               | <b>KC283336</b> | <b>KC201005</b> | JQ942636        | <b>KC421259</b> | <b>KC284508</b> |                 |
| Acacia pentadenia<br>Lindl.                        | Kings Park BG<br>19950033  | JF420288        | JF420066        | JF420396        | <b>KC421302</b> | JF420178        |                 |
| Acacia perangusta<br>(C.T.White)<br>Pedley         | nindethana NS-<br>4762     |                 | <b>KC201006</b> | JQ942749        | <b>KC421365</b> | <b>KC284511</b> | <b>KC958159</b> |
| Acacia perryi<br>Pedley                            | ANBG 8409521               | JF420274        | JF420052        | JF420383        |                 | JF420164        | <b>KC958054</b> |
| Acacia petraea<br>Pedley                           | Mount Annan<br>BG 20001253 |                 | <b>KC201008</b> | JQ942879        |                 | <b>KC284513</b> |                 |
| Acacia peuce<br>F.Muell.                           | J.T. Miller 1555           | <b>KC283820</b> |                 | JQ943228        | <b>KC421845</b> | <b>KC284514</b> | <b>KC957855</b> |
| Acacia<br>phlebopetala<br>Maslin                   | nindethana NS-<br>580      | <b>KC283406</b> |                 | JQ942747        | <b>KC421363</b> | <b>KC284516</b> | <b>KC958157</b> |
| Acacia<br>phlebophylla<br>F.Muell. ex<br>H.B.Will. | ANBG 9909694               | <b>KC283304</b> | <b>KC201009</b> | JQ942586        | <b>KC421237</b> | <b>KC284517</b> | <b>KC958021</b> |
| Acacia pickardii<br>Tindale                        | MEL 2067966                | <b>KC283761</b> | <b>KC201010</b> | <b>KC796114</b> | <b>KF048648</b> | <b>KC284519</b> | <b>KC957720</b> |
| Acacia platycarpa<br>F.Muell.                      | Kings Park BG<br>19920462  | <b>KC283314</b> | <b>KC201013</b> | JQ942606        |                 | <b>KC284524</b> | <b>KC958041</b> |
| Acacia<br>plectocarpa<br>A.Cunn. ex<br>Benth.      | nindethana NS-<br>12777    | <b>KC283370</b> | <b>KC201014</b> | JQ942678        | <b>KC421307</b> | <b>KC284525</b> |                 |
| Acacia<br>podalyriifolia<br>A.Cunn. ex<br>G.Don    | ANBG 9406554               | <b>KC283305</b> | JF420045        | JF420374        | <b>KF048610</b> | JF420155        | JF420481        |
| Acacia polybotrya<br>Benth.                        | MELU 102550                | DQ489948        | <b>KC796211</b> | JQ942798        |                 | <b>KC284529</b> |                 |
| Acacia porcata<br>P.I.Forst.                       | CANB 9201288               |                 |                 |                 | <b>KC421929</b> | <b>KC284530</b> | <b>KC957926</b> |
| Acacia<br>praelongata<br>F.Muell.                  | MEL 693961                 | DQ029291        | <b>KC796223</b> | JQ942820        | <b>KC421408</b> | <b>KC284531</b> | <b>KC958209</b> |
| Acacia prainii<br>Maiden                           | J.T. Miller 1563           | <b>KC283827</b> | <b>KC201018</b> | JQ943235        | <b>KC421852</b> | <b>KC284533</b> | <b>KC957861</b> |

|                                                 |                           |                 |                 |          |                 |                 |                       |
|-------------------------------------------------|---------------------------|-----------------|-----------------|----------|-----------------|-----------------|-----------------------|
| Acacia pravifolia<br>F.Muell.                   | ANBG 680182               | <b>KC283307</b> | <b>KC201019</b> | JQ942589 | <b>KC421239</b> | <b>KC284534</b> | <b>KC958024</b>       |
| Acacia pravissima<br>F.Muell. ex<br>Benth.      | ANBG 8700071              | JF420255        | JF420032        | JF420362 | <b>KF048607</b> | JF420142        | JF420468              |
| Acacia producta<br>Tindale                      | CANB 490908               | <b>KC283894</b> |                 |          | <b>KC421928</b> | <b>KC284535</b> |                       |
| Acacia proiantha<br>Pedley                      | CANB 584110               | <b>KC283893</b> | <b>KC201021</b> | JQ943293 | <b>KC421927</b> | <b>KC284538</b> | <b>KC957925</b>       |
| Acacia prominens<br>A.Cunn. ex<br>G.Don         | Mount Annan<br>BG 981404  | JF420312        | <b>KF048794</b> | JF420423 |                 | <b>KC796189</b> | JF420525              |
| Acacia<br>pruinocarpa<br>Tindale                | ATSC 17237                | <b>KC283505</b> | <b>KC201023</b> | JQ942925 | <b>KC421435</b> | <b>KC284540</b> | <b>KC958304</b>       |
| Acacia pruinosa<br>A.Cunn. ex<br>Benth.         | nindethana NS-<br>674     | <b>KC796097</b> | <b>KF048785</b> | JF420392 | <b>KC421278</b> | JF420173        |                       |
| Acacia<br>pteroaulon<br>Maslin                  | R.J. Cranfield<br>2194    | <b>KC796099</b> | <b>KC955265</b> |          |                 | <b>KC598187</b> |                       |
| Acacia<br>ptychophylla<br>F.Muell.              | ATSC 16799                | <b>KC283553</b> | <b>KC201028</b> | JQ942980 | JF419998        | JF420218        | <b>KC958358</b>       |
| Acacia pubicosta<br>C.T.White                   | nindethana NS-<br>6453    | <b>KC283409</b> | <b>KC201029</b> | JQ942751 |                 | <b>KC284548</b> | <b>KC958161</b>       |
| Acacia pubifolia<br>Pedley                      | nindethana NS-<br>3652    | <b>KC283408</b> | <b>KC201030</b> | JQ942750 | <b>KC421366</b> | <b>KC284550</b> | <b>KC958160</b>       |
| Acacia pulchella<br>var. glaberrima<br>Meisn.   | CANB 615720               |                 | AF360726        |          | <b>KF048598</b> | AF195724        | AF195673;<br>AF195692 |
| Acacia pustula<br>Maiden &<br>Blakely           | Mount Annan<br>BG 842481  | <b>KC283417</b> |                 | JQ942762 | <b>KC421373</b> | <b>KC284552</b> | <b>KC958165</b>       |
| Acacia pycnantha<br>Benth.                      | nindethana NS-<br>303     | JF420273        | JF420051        | JF420382 |                 | JF420163        | <b>KC958048</b>       |
| Acacia<br>pycnostachya<br>F.Muell. ex<br>Benth. | ANBG 8600672              |                 |                 |          | <b>KC421240</b> | <b>KC284554</b> | <b>KC958025</b>       |
| Acacia pygmaea<br>Maslin                        | CANB 8310847              | <b>KC283891</b> | <b>KC201033</b> | JQ943290 | <b>KC421924</b> | <b>KC284555</b> | <b>KC957922</b>       |
| Acacia pyrifolia<br>DC.                         | Kings Park BG<br>19860313 | JF420238        | JF420017        | JF420345 | <b>KF048602</b> | JF420124        |                       |
| Acacia ramulosa<br>W.Fitzg.                     | J.T. Miller 1569          | <b>KC283833</b> | <b>KC201034</b> | JQ943242 | <b>KC421859</b> | <b>KC284557</b> | <b>KC957868</b>       |
| Acacia redolens<br>Maslin                       | CANB 615712s2             | <b>KC283512</b> | <b>KC201044</b> | JQ942934 | <b>KC421442</b> | <b>KC284560</b> | <b>KC958313</b>       |
| Acacia repanda<br>R.S.Cowan &<br>Maslin         | ATSC 17663                | <b>KC283521</b> | <b>KC201045</b> | JQ942944 | <b>KC421450</b> | <b>KC284561</b> | <b>KC958323</b>       |
| Acacia retinervis<br>Benth.                     | ATSC 18822                | <b>KC283540</b> | <b>KC201046</b> | JQ942966 | <b>KC421470</b> | <b>KC284562</b> | <b>KC958345</b>       |
| Acacia retinodes<br>Schltdl.                    | CANB 587946               | JF420311        | JF420090        | JF420422 |                 | <b>KC796188</b> | JF420524              |
| Acacia retivenea<br>F.Muell.                    | Leg. ign. s.n. 23         | <b>KC283246</b> | <b>KC201048</b> | JQ942484 |                 |                 |                       |

|                                                       |                             |                 |                 |                 |                 |                 |                 |
|-------------------------------------------------------|-----------------------------|-----------------|-----------------|-----------------|-----------------|-----------------|-----------------|
| Acacia<br>rhamphophylla<br>Maslin                     | CANB 496017                 | <b>KC283890</b> | <b>KC201049</b> | JQ943289        | <b>KC421923</b> | <b>KC284566</b> |                 |
| Acacia<br>rhetinocarpa<br>J.M.Black                   | ANBG 9509649                | <b>KC283308</b> |                 | JQ942590        | <b>KC421241</b> | <b>KC284567</b> | <b>KC958026</b> |
| Acacia<br>rhiophylla<br>F.Muell. ex<br>Benth.         | JMseed 1661                 | <b>KC283411</b> | <b>KC201050</b> | JQ942753        |                 |                 |                 |
| Acacia<br>rhodophloia<br>Maslin                       | J.T. Miller 1535            | <b>KC283807</b> | <b>KC201052</b> | JQ943213        | <b>KC421831</b> | <b>KC284569</b> | <b>KC957840</b> |
| Acacia rigens<br>A.Cunn. ex<br>G.Don                  | ANBG 9809063                | <b>KC283309</b> | <b>KC201053</b> | JQ942591        | <b>KC421242</b> | <b>KC284570</b> | <b>KC958027</b> |
| Acacia rivalis<br>J.M.Black                           | nindethana NS-<br>10457     | <b>KC283341</b> | <b>KC201054</b> | JQ942645        | <b>KC421270</b> | <b>KC284571</b> |                 |
| Acacia rostellifera<br>Benth.                         | MEL 2319043                 | <b>KC283765</b> | <b>KC201056</b> | <b>KC796115</b> | <b>KF048652</b> | <b>KC284573</b> | <b>KC957724</b> |
| Acacia rubida<br>A.Cunn.                              | nindethana NS-<br>6896      | <b>KC283366</b> | <b>KC201058</b> |                 |                 | <b>KC284575</b> | <b>KC958094</b> |
| Acacia ryaniana<br>Maslin                             | MEL 721629                  | <b>KC283767</b> | <b>KC201059</b> | <b>KC796116</b> | <b>KF048654</b> | <b>KC284577</b> | <b>KC957726</b> |
| Acacia sabulosa<br>Maslin                             | ATSC 19186                  |                 | <b>KC201062</b> | JQ942949        | <b>KC421454</b> | <b>KC284580</b> | <b>KC958328</b> |
| Acacia saliciformis<br>Tindale                        | Mount Annan<br>BG 884112s2  | JF420305        | <b>KC796208</b> | JQ942779        | <b>KF048613</b> | <b>KC796184</b> | JF420516        |
| Acacia salicina<br>Lindl.                             | MEL 2286869s4               | <b>KC283773</b> | <b>KC201065</b> | <b>KC796117</b> | <b>KC421756</b> | <b>KC284587</b> | <b>KC957731</b> |
| Acacia saligna<br>(Labill.)<br>H.L.Wendl.             | CANB 634053                 |                 | JF420109        | JF420443        | <b>KF048600</b> | JF420223        | JF420544        |
| Acacia saxatilis<br>S.Moore                           | CANB 438981                 | <b>KC595998</b> | <b>KC796205</b> | <b>KC598185</b> | <b>KC610566</b> | <b>KC598193</b> | <b>KC610561</b> |
| Acacia schinoides<br>Benth.                           | ATSC 18258                  | JF420323        | <b>KF048795</b> | JF420434        | <b>KC957129</b> | <b>KC796192</b> | <b>KC958310</b> |
| Acacia scirpifolia<br>Meisn.                          | Kings Park BG<br>19820194   |                 |                 | JQ942604        |                 |                 | <b>KC958039</b> |
| Acacia<br>sclerophylla<br>Lindl. var.<br>sclerophylla | CANB 653259                 | <b>KC283671</b> |                 | JQ943120        | <b>KC421597</b> | <b>KC284592</b> | <b>KC957619</b> |
| Acacia<br>semicircularis<br>Maiden &<br>Blakely       | CANB 293019                 | <b>KC283889</b> | <b>KC201068</b> | JQ943288        | <b>KC421922</b> | <b>KC284595</b> | <b>KC957921</b> |
| Acacia semilunata<br>Maiden &<br>Blakely              | Mount Annan<br>BG AC 961708 | <b>KC283475</b> | <b>KC201069</b> | JQ942881        |                 | <b>KC284596</b> | <b>KC958265</b> |
| Acacia<br>semitrullata<br>Maslin                      | CANB 319829                 | <b>KC283888</b> | <b>KC201070</b> | JQ943287        | <b>KC421920</b> | <b>KC284597</b> | <b>KC957919</b> |
| Acacia sericoflora<br>Pedley                          | ATSC 16642                  | <b>KC283556</b> | <b>KC201071</b> | JQ942988        | <b>KC421487</b> | <b>KC284598</b> | <b>KC958364</b> |
| Acacia<br>sericophylla<br>F.Muell.                    | J.T. Miller 1573            | <b>KC283837</b> | <b>KC201072</b> | JQ943246        | <b>KC421863</b> | <b>KC284599</b> | <b>KC957872</b> |



|                                                  |                        |                 |                 |                 |                 |                 |                       |
|--------------------------------------------------|------------------------|-----------------|-----------------|-----------------|-----------------|-----------------|-----------------------|
| Acacia sessilispica<br>Maiden &<br>Blakely       | ATSC 17658             | <b>KC283518</b> | <b>KC201073</b> | JQ942941        | <b>KC421447</b> | <b>KC284600</b> | <b>KC958320</b>       |
| Acacia<br>shuttleworthii<br>Meisn.               | CANB 708337            | <b>KC283887</b> | <b>KC201075</b> | JQ943286        | <b>KC421919</b> | <b>KC284602</b> |                       |
| Acacia sibilans<br>Maslin                        | MEL 2327552            | <b>KC283774</b> | <b>KC201076</b> | <b>KC796118</b> | <b>KC421758</b> | <b>KC284604</b> | <b>KC957733</b>       |
| Acacia sibina<br>Maslin                          | CANB 00684981          | JN935190        | JQ248901        | JQ248665        | JQ248730        | JQ248786        | JQ248855              |
| Acacia siculiformis<br>A.Cunn. ex<br>Benth.      | ANBG 9001963           |                 | <b>KC201088</b> | JQ942552        | <b>KC421214</b> | <b>KC284608</b> | <b>KC957997</b>       |
| Acacia silvestris<br>Tindale                     | CANB 615658s2          | JF420285        | <b>KC796207</b> |                 | <b>KC421287</b> | JF420175        |                       |
| Acacia simsii<br>A.Cunn. ex<br>Benth.            | ATSC 12049             | <b>KC283345</b> |                 | JQ942649        | <b>KC421275</b> | <b>KC284612</b> | <b>KC958082</b>       |
| Acacia simulans<br>Maslin                        | CANB 380921            | <b>KC283886</b> | <b>KC201090</b> | JQ943285        | <b>KC421918</b> | <b>KC284613</b> | <b>KC957918</b>       |
| Acacia sparsiflora<br>Maiden                     | ATSC 20375             | <b>KC283543</b> |                 | JQ942969        | <b>KC421473</b> | <b>KC284614</b> | <b>KC958348</b>       |
| Acacia<br>spathulifolia<br>Maslin                | nindethana NS-<br>3591 | <b>KC283319</b> |                 | JQ942613        |                 | <b>KC284615</b> | <b>KC958047</b>       |
| Acacia spectabilis<br>A.Cunn. ex<br>Benth.       | Clarke 41s             | <b>KC283386</b> | <b>KC201091</b> | JQ942720        | <b>KC421349</b> | <b>KC284616</b> | <b>KC958137</b>       |
| Acacia spinescens<br>Benth.                      | CANB 615645            |                 | AF360700        |                 | <b>KF048593</b> | AF195725        | AF195687;<br>AF195706 |
| Acacia spirorbis<br>Labill. subsp.<br>spirorbis  | ATSC 19133             | <b>KC283537</b> | <b>KC201093</b> | <b>KC796104</b> | <b>KC421467</b> | <b>KC284620</b> | <b>KC958342</b>       |
| Acacia<br>spongolitica<br>R.S.Cowan &<br>Maslin  | ATSC 17970             |                 | <b>KC201094</b> | <b>KC796142</b> | <b>KC421788</b> | <b>KC284621</b> | <b>KC957791</b>       |
| Acacia stanleyi<br>Maslin                        | Paul Nevill<br>KPPN94  |                 |                 | JQ943061        | <b>KC421570</b> | <b>KC796200</b> | <b>KC958434</b>       |
| Acacia stenophylla<br>A.Cunn. ex<br>Benth.       | ATSC 20398             | <b>KC283501</b> | <b>KC796230</b> | JQ942920        | <b>KC421429</b> | <b>KC284622</b> | <b>KC958298</b>       |
| Acacia<br>stigmatophylla<br>A.Cunn. ex<br>Benth. | ATSC 17467             | JF420320        | <b>KC796229</b> |                 | <b>KC421425</b> |                 |                       |
| Acacia stipuligera<br>F.Muell.                   | ATSC 19176             | <b>KC283516</b> | <b>KC201098</b> | JQ942939        | <b>KC421446</b> | <b>KC284628</b> | <b>KC958318</b>       |
| Acacia storyi<br>Tindale                         | NSW 74766              | DQ489952        | <b>KC796215</b> | JQ942802        |                 | <b>KC284629</b> | <b>KC958194</b>       |
| Acacia stowardii<br>Maiden                       | CANB 744443            | <b>KC283676</b> |                 | JQ943128        | <b>KC421602</b> | <b>KC284631</b> | <b>KC957624</b>       |
| Acacia striatifolia<br>Pedley                    | ATSC 20371             | <b>KC283513</b> | <b>KC201100</b> | JQ942935        | <b>KC421443</b> | JF420216        | JF420537              |
| Acacia<br>strongylophylla<br>F.Muell.            | MEL 2287670            | <b>KC283780</b> | <b>KC201102</b> | <b>KC796119</b> | <b>KC421766</b> | <b>KC284638</b> | <b>KC957741</b>       |

|                                                 |                           |                 |                 |                 |                 |                 |                 |
|-------------------------------------------------|---------------------------|-----------------|-----------------|-----------------|-----------------|-----------------|-----------------|
| Acacia suaveolens<br>(Sm.) Willd.               | Clarke 24s                | <b>KC283380</b> | <b>KC201106</b> | JQ942704        | <b>KC421332</b> | <b>KC284641</b> | <b>KC958122</b> |
| Acacia subrigida<br>Maslin                      | MELU-SRA 106              | JF420307        | JF420086        | JF420418        | <b>KF048617</b> | <b>KC796187</b> | JF420521        |
| Acacia subsessilis<br>A.R.Chapm. &<br>Maslin    | CANB 543939               | <b>KC283884</b> | <b>KC201107</b> | JQ943284        | <b>KC421916</b> | <b>KC284642</b> | <b>KC957916</b> |
| Acacia<br>subtessarogona<br>Tindale &<br>Maslin | ATSC 14060                | <b>KC283497</b> | <b>KC201108</b> | JQ942911        | KC421423        | <b>KC284644</b> | <b>KC958289</b> |
| Acacia subulata<br>Bonpl.                       | ANBG 657697               | JF420267        | <b>KF048781</b> | JF420376        | <b>KC421244</b> | JF420157        | <b>KC958029</b> |
| Acacia<br>sulcaticaulis<br>Maslin &<br>Buscumb  | CANB 713423               | <b>KC283883</b> | <b>KC201109</b> | JQ943283        | <b>KC421915</b> | <b>KC284645</b> | <b>KC957915</b> |
| Acacia<br>synchronica<br>Maslin                 | MEL 2252506               | <b>KC283783</b> | <b>KC201110</b> | <b>KC796120</b> |                 | <b>KC284647</b> | <b>KC957744</b> |
| Acacia tarculensis<br>J.M.Black                 | CANB 635788               |                 |                 | JQ943077        | <b>KF048628</b> | <b>KC284650</b> |                 |
| Acacia telmica<br>A.R.Chapm. &<br>Maslin        | ATSC 17642                | <b>KC283499</b> | <b>KC201111</b> | JQ942917        | <b>KC421427</b> | <b>KC284651</b> | <b>KC958295</b> |
| Acacia tenuinervis<br>Pedley                    | Mount Annan<br>BG 842698  | <b>KC283486</b> | <b>KC201114</b> | JQ942897        |                 | <b>KC284655</b> | <b>KC958277</b> |
| Acacia tenuispica<br>Maslin                     | CANB 461656               | <b>KC283881</b> | <b>KC201115</b> | JQ943281        | <b>KC421913</b> | <b>KC284656</b> |                 |
| Acacia tenuissima<br>F.Muell.                   | ATSC 14617                | <b>KC283515</b> | <b>KC201117</b> | JQ942938        | <b>KC421445</b> | <b>KC284658</b> | <b>KC958317</b> |
| Acacia tephрина<br>Pedley                       | CBG 8313484               | <b>KC283641</b> | <b>KC201118</b> | JQ943080        | <b>KF048629</b> | <b>KC284660</b> | <b>KC957587</b> |
| Acacia terminalis<br>(Salisb.)<br>J.F.Macbr.    | ANBG 643853               | JN088170        |                 | JN088174        | JN088176        | JN088178        | JN088180        |
| Acacia tessellata<br>Tindale &<br>Kodala        | CANB 00503646             | <b>KC283643</b> |                 | JQ943082        | <b>KC421572</b> | <b>KC284664</b> | <b>KC957588</b> |
| Acacia<br>tetragonophylla<br>F.Muell.           | nindethana NS-<br>9479    | <b>KC283334</b> | <b>KC201122</b> | JQ942634        | <b>KC421257</b> | <b>KC284665</b> | <b>KC958066</b> |
| Acacia thomsonii<br>Maslin &<br>M.W.McDonald    | ATSC 19974                | <b>KC283541</b> | <b>KC201132</b> | JQ942967        | <b>KC421471</b> | <b>KC284667</b> | <b>KC958346</b> |
| Acacia tindaleae<br>Pedley                      | Mount Annan<br>BG 842647  | JN935195        | JQ248902        | JQ248671        |                 | JQ248791        | JQ248859        |
| Acacia torulosa<br>Benth.                       | ATSC 20360                | JN935196        | JQ248903        | JQ248672        | JQ248732        | JQ248792        | JQ248860        |
| Acacia<br>trachycarpa<br>E.Pritz.               | Kings Park BG<br>19810126 |                 |                 | JQ942500        | <b>KC421182</b> | <b>KC284668</b> |                 |
| Acacia<br>trachyphloia<br>Tindale               | ATSC 16249                | <b>KC283493</b> | <b>KC201134</b> | JQ942905        | <b>KC421419</b> | <b>KC284669</b> | <b>KC958283</b> |
| Acacia translucens<br>A.Cunn. ex<br>Hook.       | CANB 615618               |                 | AF360722        |                 | <b>KF048588</b> | AF525004        | AF522984        |

|                                                       |                         |                 |                 |                 |                 |                 |                 |
|-------------------------------------------------------|-------------------------|-----------------|-----------------|-----------------|-----------------|-----------------|-----------------|
| Acacia triptera<br>Benth.                             | Clarke 18t              | JF420227        |                 | JF420334        | <b>KC421327</b> | <b>KC796180</b> | <b>KC958117</b> |
| Acacia triquetra<br>Benth.                            | CBG 8210236             | JF420257        | JF420034        | JF420364        | <b>KF048609</b> | JF420144        | JF420470        |
| Acacia tropica<br>(Maiden &<br>Blakely) Tindale       | ATSC 13844              | <b>KC283284</b> | <b>KC201135</b> | JQ942555        | <b>KC421215</b> | <b>KC284671</b> | <b>KC958000</b> |
| Acacia tumida<br>F.Muell. ex<br>Benth. var.<br>tumida | ATSC 19197              |                 | <b>KC201138</b> | <b>KC796143</b> | <b>KC421789</b> | <b>KC284673</b> | <b>KC957792</b> |
| Acacia tysonii<br>Luehm.                              | MEL 2137099s3           | <b>KC283789</b> | <b>KC201141</b> | <b>KC796121</b> | <b>KC421776</b> | <b>KC284676</b> | <b>KC957751</b> |
| Acacia umbellata<br>A.Cunn. ex<br>Benth.              | ATSC 16181              | <b>KC283552</b> | <b>KC201142</b> | JQ942979        | <b>KC421482</b> | <b>KC284677</b> | <b>KC958357</b> |
| Acacia<br>umbraculiformi<br>s Maslin &<br>Buscumb     | Paul Nevill<br>KPPN42   | <b>KC283593</b> | <b>KC201147</b> | JQ943027        | <b>KC013753</b> | <b>KC796196</b> | JX870573        |
| Acacia uncinata<br>Lindl.                             | CBG/ANBG<br>643858      | JN935199        | JQ248906        | JQ248675        |                 | JQ248795        | JQ248861        |
| Acacia<br>undoolyana<br>G.J.Leach                     | J.T. Miller 1559        | <b>KC283824</b> | <b>KC201154</b> | JQ943232        | <b>KC421849</b> | <b>KC284679</b> | <b>KC957858</b> |
| Acacia validinervia<br>Maiden &<br>Blakely            | ATSC 16769              | <b>KC283495</b> | <b>KC201155</b> | JQ942907        | <b>KC421420</b> | <b>KC284680</b> | <b>KC958285</b> |
| Acacia venulosa<br>Benth.                             | ANBG 8800208            |                 | <b>KC201156</b> | JQ942648        | <b>KC421274</b> | <b>KC284681</b> | <b>KC958081</b> |
| Acacia verniciflua<br>A.Cunn.                         | Mount Annan<br>BG 13007 |                 | JF420084        | JF420414        | <b>KF048614</b> | <b>KC796185</b> | JF420517        |
| Acacia verricula<br>R.S.Cowan &<br>Maslin             | nindethana NS-<br>17740 | <b>KC283412</b> | <b>KC201157</b> | JQ942754        | <b>KC421368</b> | <b>KC284682</b> |                 |
| Acacia vestita Ker<br>Gawl.                           | ATSC 16251              | JF420327        | JF420105        | JF420438        | <b>KC957134</b> | <b>KC796195</b> | <b>KC958360</b> |
| Acacia victoriae<br>subsp. arida<br>Pedley            | AD 99835210             | DQ029310        | <b>KF048792</b> | JF420419        |                 | <b>KC284685</b> | <b>KC958213</b> |
| Acacia viscidula<br>Benth.                            | ANBG 53549              |                 |                 | JQ942597        | <b>KC421247</b> | <b>KC284688</b> | <b>KC958033</b> |
| Acacia wanyu<br>Tindale                               | nindethana NS-<br>8797  | <b>KC283480</b> |                 | JQ942889        |                 | <b>KC284690</b> | <b>KC958271</b> |
| Acacia wattiana<br>F.Muell. ex<br>Benth.              | ATSC 19338              | JF420333        | <b>KF048796</b> | JF420445        | <b>KC957130</b> | <b>KC796193</b> | <b>KC958312</b> |
| Acacia<br>wilhelmiana<br>F.Muell.                     | nindethana NS-<br>8663  | JN935200        | JQ248907        | JQ248677        |                 | JQ248796        | JQ248863        |
| Acacia<br>woodmaniorum<br>Maslin &<br>Buscumb         | Paul Nevill<br>KPPN71   | <b>KC283618</b> |                 | JQ943043        | <b>KC421553</b> | <b>KC796199</b> | JX870598        |
| Acacia xanthina<br>Benth.                             | MEL 2327555s3           | <b>KC283790</b> | <b>KC201164</b> | <b>KC796122</b> | <b>KF048661</b> | <b>KC284696</b> | <b>KC957756</b> |
| Acacia xiphophylla<br>E.Pritz.                        | CANB 00527999           | JN935201        |                 | JQ248678        | JQ248734        | JQ248797        |                 |

|                                                                               |             |                 |                 |          |          |                 |                 |
|-------------------------------------------------------------------------------|-------------|-----------------|-----------------|----------|----------|-----------------|-----------------|
| Acacia<br>yirrkallensis<br>Specht                                             | ATSC 18006  | <b>KC283517</b> | <b>KC201165</b> | JQ942940 |          | <b>KC284698</b> | <b>KC958319</b> |
| Pararchidendron<br>pruinatum<br>(Benth.)<br>I.C.Nielsen                       | CANB 615549 | JF420304        | JF420082        |          | AF274127 | EU811953        | EU439985        |
| Paraserianthes<br>lophantha<br>(Willd.)<br>I.C.Nielsen<br>subsp.<br>lophantha | OFI790/474  | JF420331        | <b>KF048780</b> |          | AF274128 | EU811978        | EU440016        |
